# Supplementary material for: Ulcerative colitis alleviation of colon-specific delivered rhamnolipid/fullerene nanocomposites via dual modulation in oxidative stress and intestinal microbiome
Source: Royal Society of Chemistry journal article supplement (doi:10.1039/d3tb00714f), 2023-01-01
Supplement: d3tb00714f1.pdf [file d3tb00714f1.pdf]

## Supporting Information

### **Ulcerative Colitis Alleviation of Colon-Specific Delivered Rhamnolipid/Fullerene Nanocomposite via Dual Modulation in Oxidative Stress and Intestinal Microbiome**

Yuxuan Xia,<sup>a</sup> Liu Hong<sup>\*a</sup>, Jiayao Zheng,<sup>a</sup> Ziyi Lu,<sup>a</sup> Qiong Zhang,<sup>a</sup> Siyu Chen,<sup>a</sup> Zhi Pang,<sup>b,c</sup> Lei Li,<sup>d</sup> Shumiao Qiao,<sup>e</sup> Qiang Wang,<sup>e</sup> Yonghua Zhou<sup>\*e</sup> and Cheng Yang<sup>a</sup>

<sup>a</sup> *Key Laboratory of Synthetic and Biological Colloids, Ministry of Education, School of Chemical and Material Engineering, Jiangnan University, Wuxi 214122, China*

<sup>b</sup> *Department of Digestive Disease and Nutrition Research Center, The Affiliated Suzhou Hospital of Nanjing Medical University, Suzhou Municipal Hospital, Gusu School, Nanjing Medical University, Suzhou 215008, China*

<sup>c</sup> *Department of Gastroenterology, The Affiliated Suzhou Hospital of Nanjing Medical University, Suzhou Municipal Hospital, Gusu School, Nanjing Medical University, Suzhou 215008, China*

<sup>d</sup> *Wuxi School of Medicine, Jiangnan University, Wuxi 214122, China*

<sup>e</sup> *Key Laboratory of National Health Commission on Parasitic Disease Control and Prevention, Jiangsu Provincial Key Laboratory on Parasite and Vector Control, Jiangsu Institute of Parasitic Diseases and Public Health Research Center of Jiangnan University, Wuxi 214064, China*

# Contents

## 1. Structure determination of RL/C<sub>60</sub>

Fig. S1. FT-IR spectrum of RL/C<sub>60</sub>

Fig. S2. UV-visible absorption spectra of C<sub>60</sub>, RL and RL/C<sub>60</sub>

Fig. S3 TGA plots of RL/C<sub>60</sub> as tested in N<sub>2</sub>

Table S1 Estimation of RL/C<sub>60</sub> composition based on TGA data

## 2. Biocompatibility and antioxidant capacity of RL/C<sub>60</sub>

Fig. S4 Radical scavenging ability of RL/C<sub>60</sub> with different concentrations

## 3. pH responsive behavior of RL/C<sub>60</sub>

Fig. S5 Stability of RL/C<sub>60</sub> at different pH conditions as shown by FT-IR spectra

Fig. S6 Zeta potential of RL/C<sub>60</sub> at different pH conditions

Fig. S7 Visual depiction of RL/C<sub>60</sub> release behavior at different pH conditions

## 4. Evaluation of anti-inflammatory performance of RL/C<sub>60</sub>

Fig. S8 *In-vitro* antioxidant capacity of RL/C<sub>60</sub>

Fig. S9 Anatomical photograph of typical mice in different groups

Fig. S10 Daily mice body weight of different groups

Table S2 DAI scoring criteria

Fig. S11 Comparative diagram of mice colon length in different groups

Fig. S12 Th1 and Th2 cells in splenocytes

Fig. S13 Colon-targeted delivery of FITC-labeled RL/C<sub>60</sub>

## 5. Modulation effect of RL/C<sub>60</sub> on the composition of intestinal microbiota

Fig. S14 PoCA diagram of intestinal microflora (phylum level) from different groups

Fig. S15 Intestinal bacteria community heatmap analysis

Fig. S16 Comparison of group differences in microflora at phylum level

Fig. S17 Potential pathogenic histogram of microbiome in different groups predicted by BugBase

Fig. S18 RL/C<sub>60</sub> promotes probiotics colonization while suppresses harmful bacteria proliferation

## 6. Intestinal flora-immunity relationship and its implication on UC treatment

Fig. S19 Correlation heatmap of inflammatory indicators vs. microflora at genus level

Table S4 SCFAs content in intestinal feces of mice in different groups

## 1. Structure determination of RL/C<sub>60</sub>

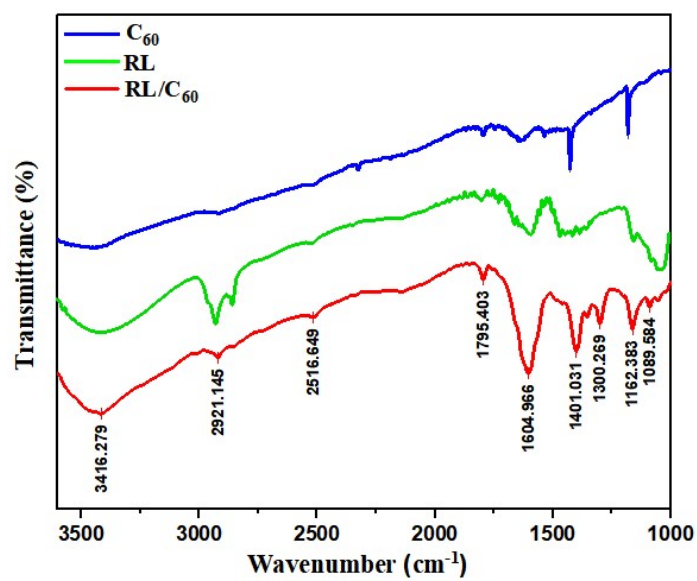

Fig. S1 FT-IR spectrum of C<sub>60</sub>, RL and RL/C<sub>60</sub>.

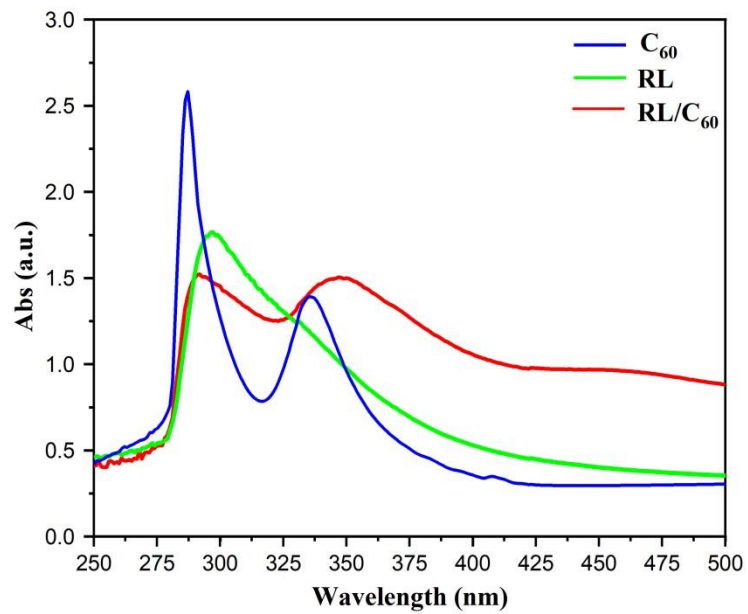

**Fig. S2** UV-visible absorption spectra of C<sub>60</sub>, RL and RL/C<sub>60</sub>.

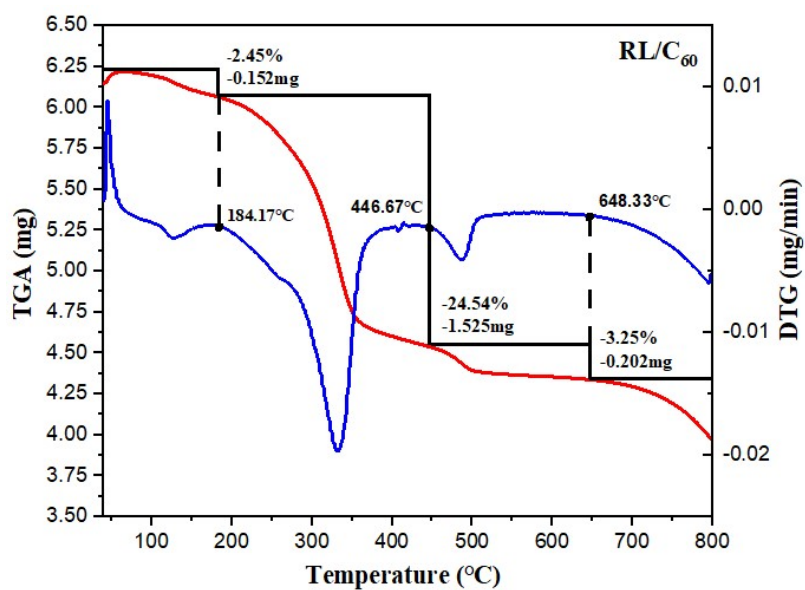

**Fig. S3** TGA plots of RL/C<sub>60</sub> as tested in N<sub>2</sub>.

**Table S1** Estimation of RL/C<sub>60</sub> composition based on TGA data

| Sample             | Weight loss (%)                             |       |                                         | $M_{RL}$  | $M_{H_2O}$ |
|--------------------|---------------------------------------------|-------|-----------------------------------------|-----------|------------|
|                    | $y_1$                                       | $y_2$ | $y_3$                                   |           |            |
|                    | 2.45                                        | 24.54 | 73.01                                   |           |            |
| RL/C <sub>60</sub> | $N_{H_2O} = (720 * y_1) / (M_{H_2O} * y_3)$ |       | $N_{RL} = (720 * y_2) / (M_{RL} * y_3)$ | $N_{C60}$ |            |
|                    | 1.34                                        |       | 0.48                                    | 1         |            |

## 2. Biocompatibility and antioxidant capacity of RL/C<sub>60</sub>

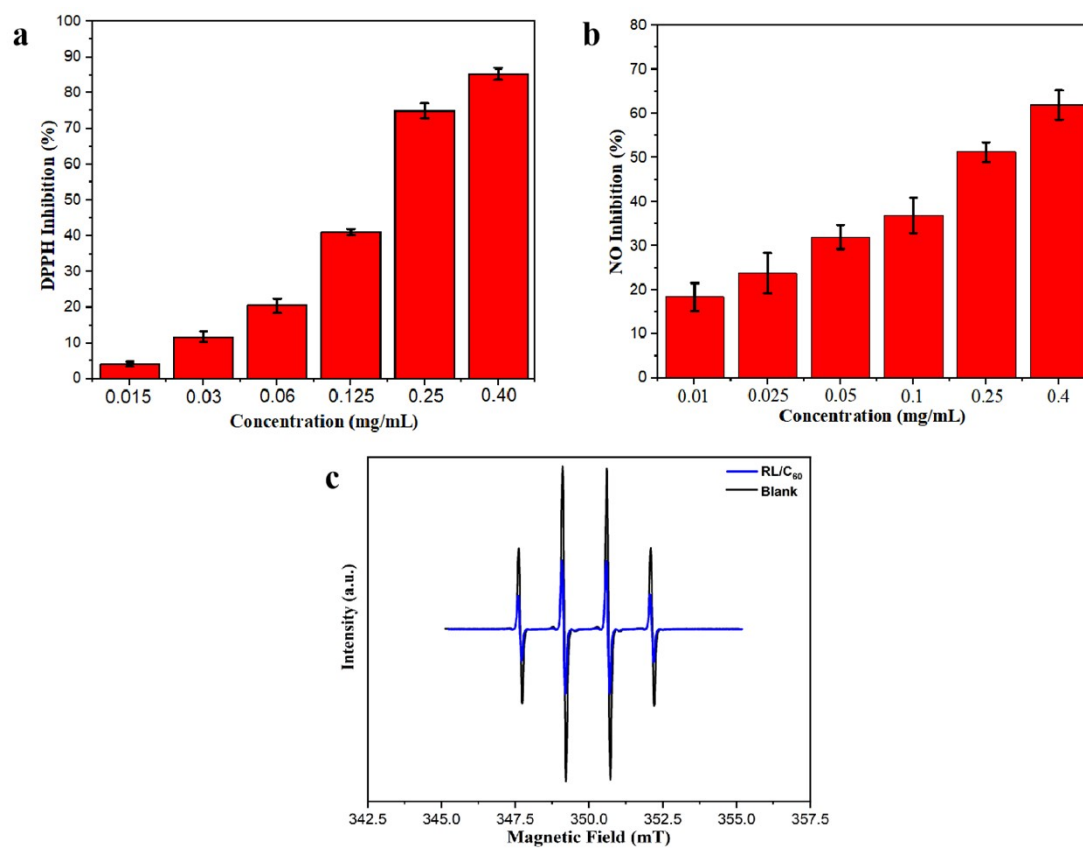

**Fig. S4** Radical scavenging ability of RL/C<sub>60</sub> with different concentrations: (a) DPPH radical (0.015~0.4 mg/mL); (b) ·NO (0.015~0.4 mg/mL); (c) ·OH (0.4 mg/mL).

### 3. pH responsive behavior of RL/C<sub>60</sub>

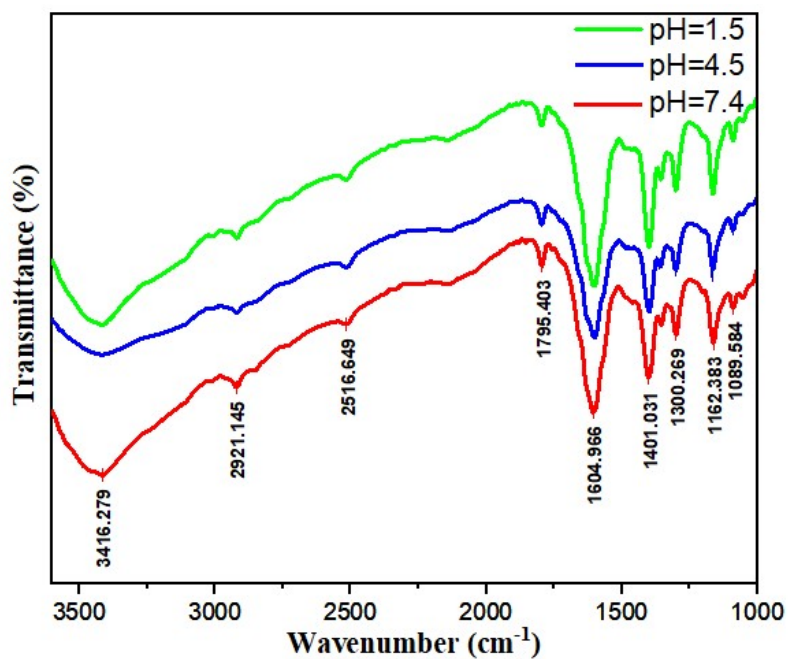

**Fig. S5** Stability of RL/C<sub>60</sub> at different pH conditions as shown by FT-IR spectra.

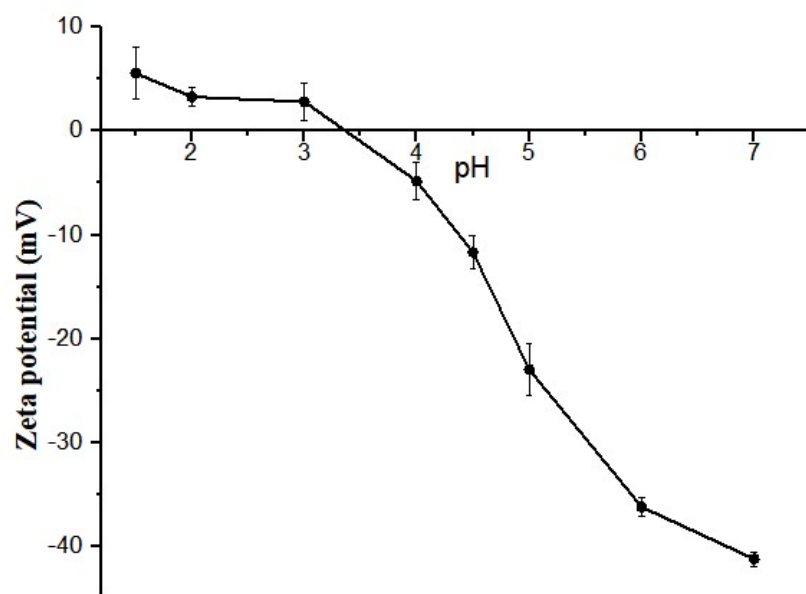

**Fig. S6** Zeta potential of RL/C<sub>60</sub> at different pH conditions



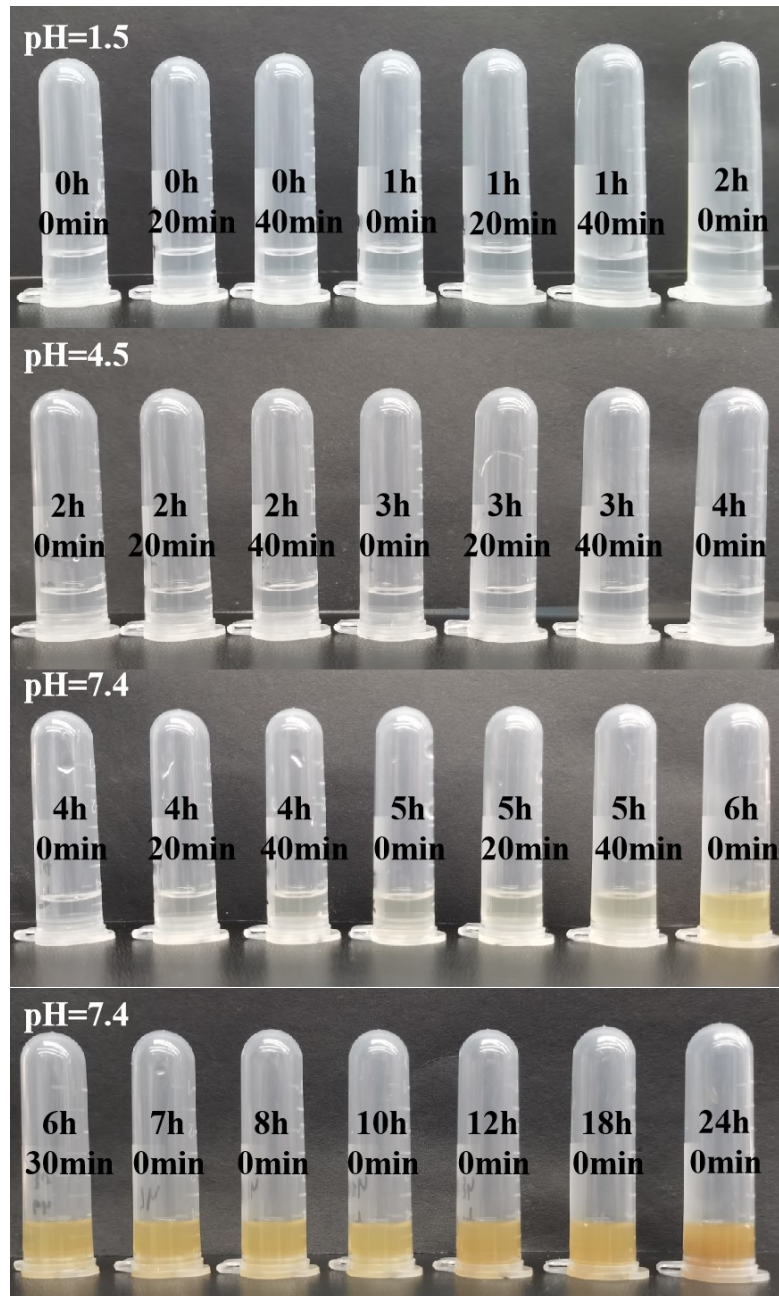

**Fig. S7** Visual depiction of RL/C<sub>60</sub> release behavior at different pH conditions.

#### 4. Evaluation of anti-inflammatory performance of RL/C<sub>60</sub>

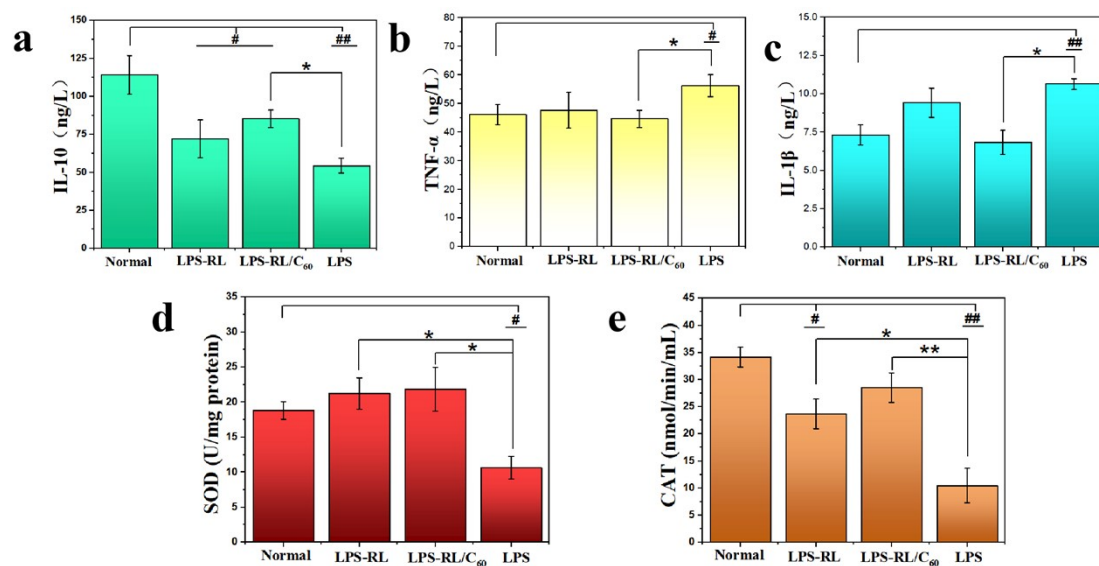

**Fig. S8** *In-vitro* antioxidant capacity of RL/C<sub>60</sub>: (a) IL-10, (b) TNF- $\alpha$ , (c) IL-1 $\beta$ , (d) SOD, (e) CAT. Data are shown as the mean  $\pm$  S.E.M. ( $n = 3$ ). Statistical significance was evaluated via one-way ANOVA with Tukey Test. #  $P \leq 0.05$ , ##  $P \leq 0.01$  vs Normal; \*  $P \leq 0.05$ , \*\*  $P \leq 0.01$  vs LPS.

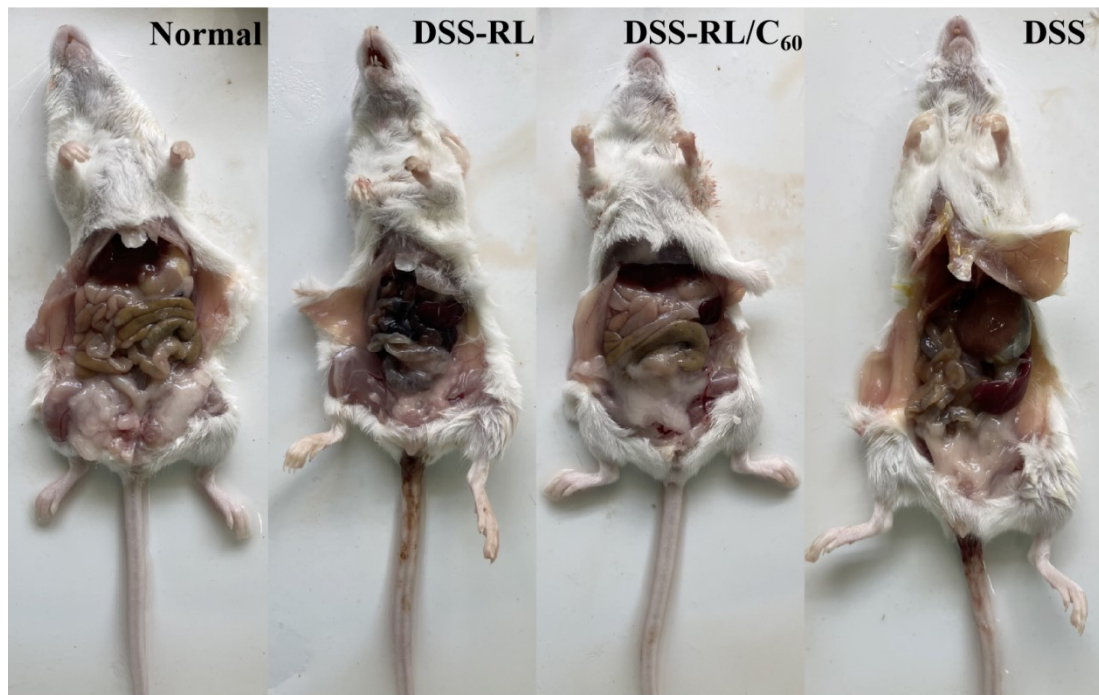

**Fig. S9** Anatomical photograph of typical mice in different groups.

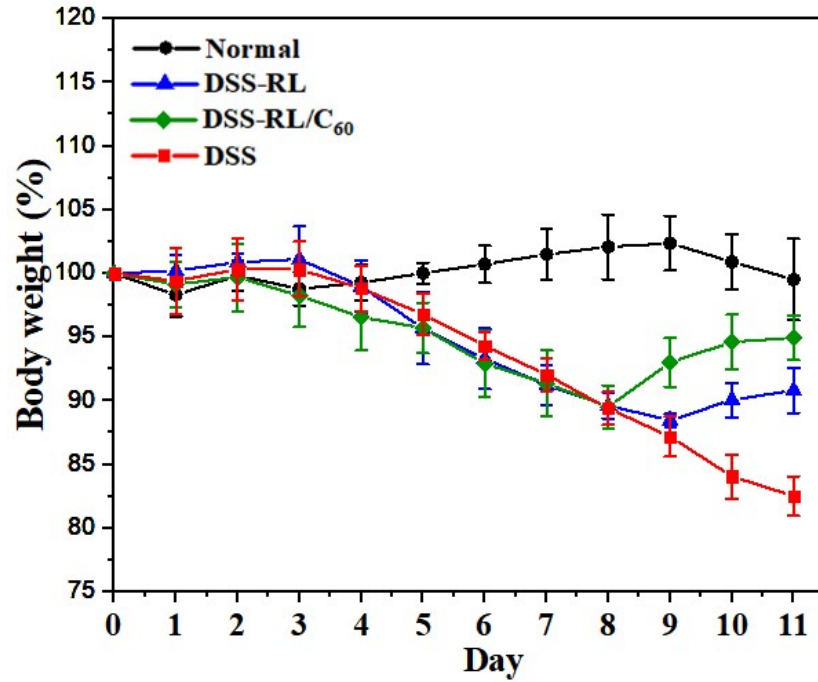

**Fig. S10** Daily mice body weight of different groups. Data are shown as the mean  $\pm$  S.E.M. ( $n = 4$ ).

**Table S2** DAI scoring criteria

| Score | Weight Loss (%)  | Stool Condition   | Hematochezia          |
|-------|------------------|-------------------|-----------------------|
| 0     | $X < 2$          | normal            | no rectal bleeding    |
| 1     | $2 \leq X < 5$   | softer stool      | weak hemocult         |
| 2     | $5 \leq X < 10$  | moderate diarrhea | visual blood in stool |
| 3     | $10 \leq X < 15$ | diarrhea          | fresh rectal bleeding |
| 4     | $X \geq 15$      | /                 | /                     |

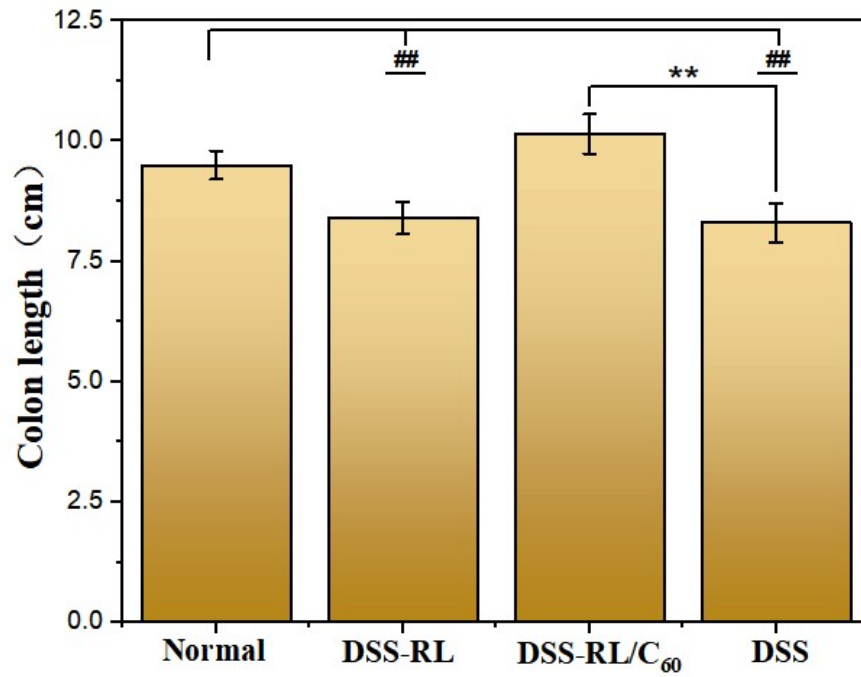

**Fig. S11** Comparative diagram of mice colon length in different groups. Data are shown as the mean  $\pm$  S.E.M. ( $n = 4$ ). Statistical significance was evaluated via one-way ANOVA with Tukey Test. #  $P \leq 0.05$ , ##  $P \leq 0.01$  vs Normal; \*\*  $P \leq 0.01$  vs DSS.

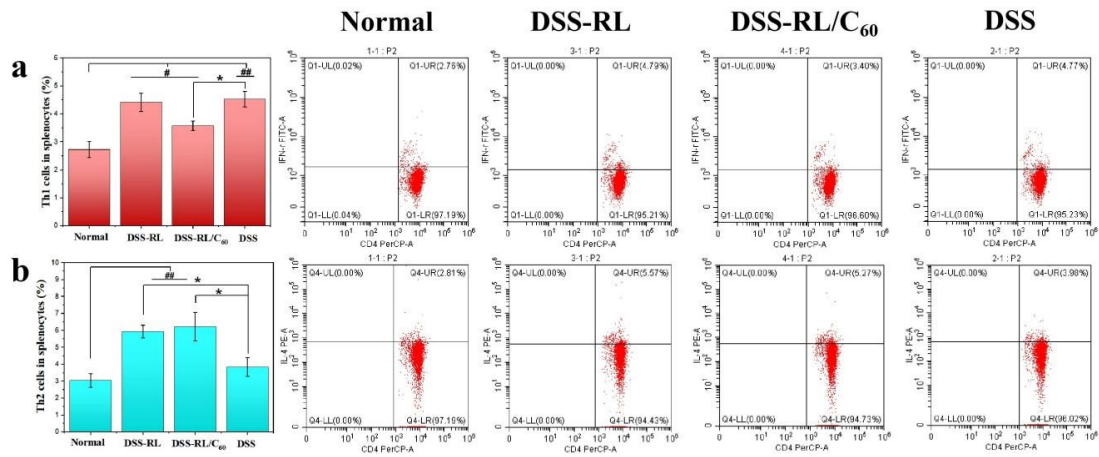

**Fig. S12** Th1 and Th2 cells in splenocytes and corresponding flow cytometry data: (a) Th1 cells; (b) Th2 cells. Data are shown as the mean  $\pm$  S.E.M. ( $n = 4$ ). Statistical significance was evaluated via one-way ANOVA with Tukey Test. #  $P \leq 0.05$ , ##  $P \leq 0.01$  vs Normal; \*  $P \leq 0.05$  vs DSS.

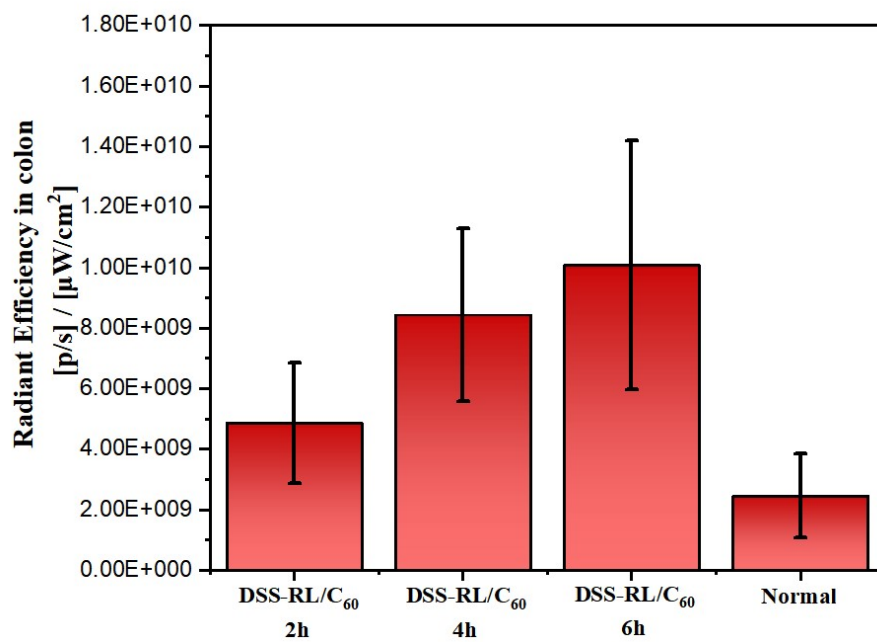

**Fig. S13** Colon-targeted delivery of FITC-labeled RL/C<sub>60</sub>. Data are shown as the mean ± S.E.M. (n = 4).

## 5. Modulation effect of RL/C<sub>60</sub> on the composition of intestinal microbiota

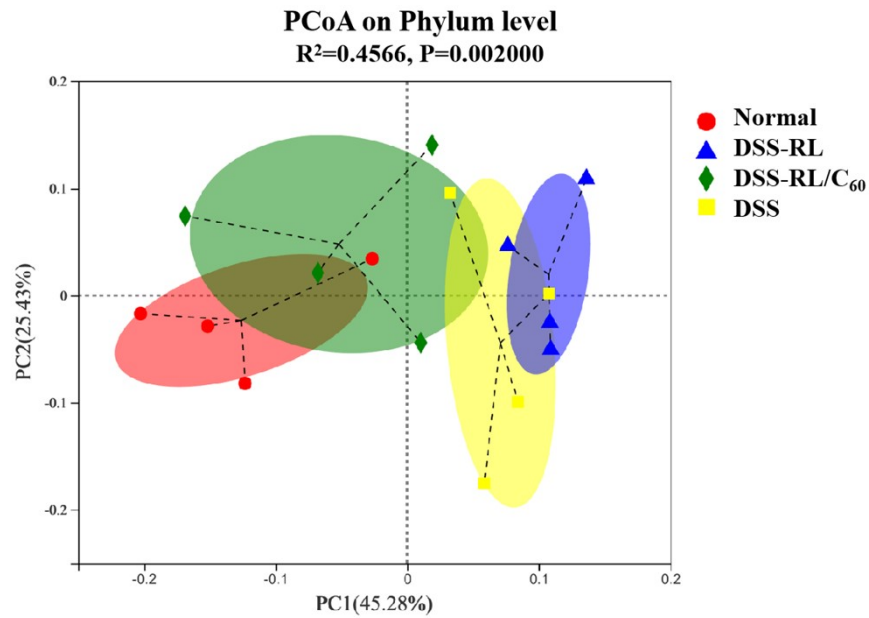

**Fig. S14** PoCA diagram of intestinal microflora (phylum level) from different groups.



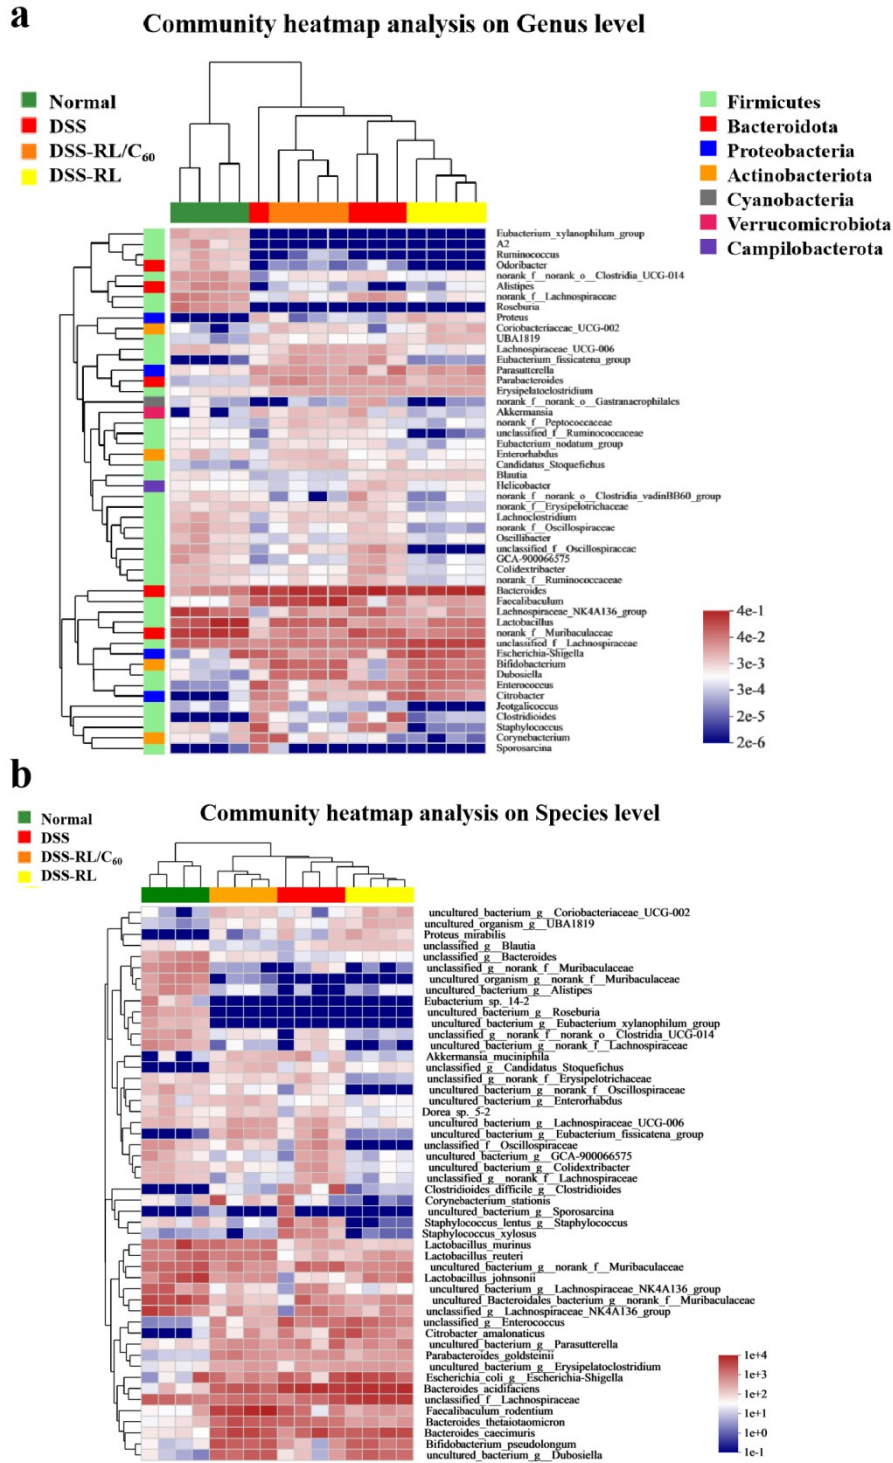

**Fig. S15** Intestinal bacteria community heatmap analysis: (a) genus level; (b) species level.

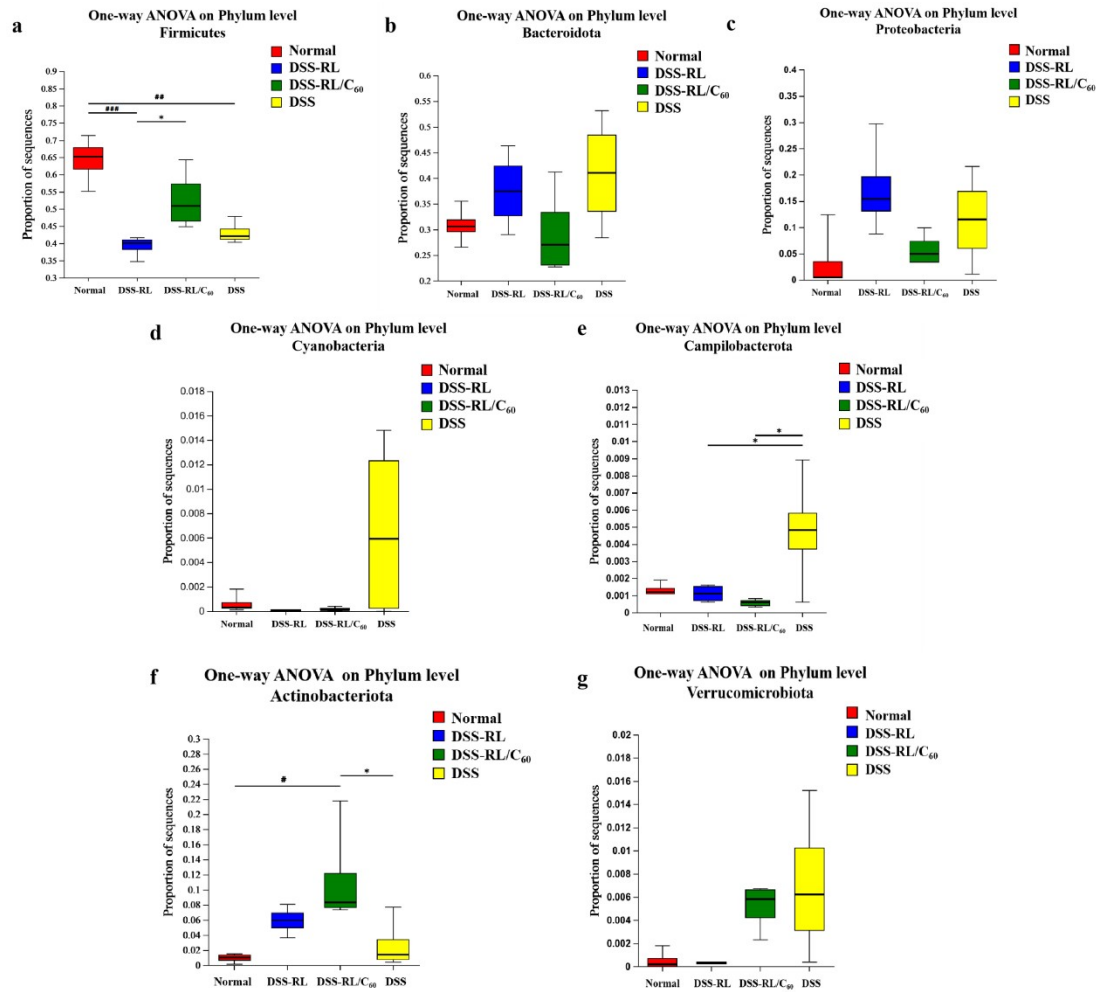

**Fig. S16** Comparison of group differences in microflora at phylum level: (a) *Firmicutes*; (b) *Bacteroidota*; (c) *Proteobacteria*; (d) *Cyanobacteria*; (e) *Campilobacterota*; (f) *Actinobacteriota*; (g) *Verrucomicrobiota*. Data are shown as the mean  $\pm$  S.E.M. ( $n = 4$ ). Statistical significance was evaluated via one-way ANOVA with Tukey Test. #  $P \leq 0.05$ , ##  $P \leq 0.01$ , ###  $P \leq 0.001$  vs Normal; \*  $P \leq 0.05$  vs DSS.

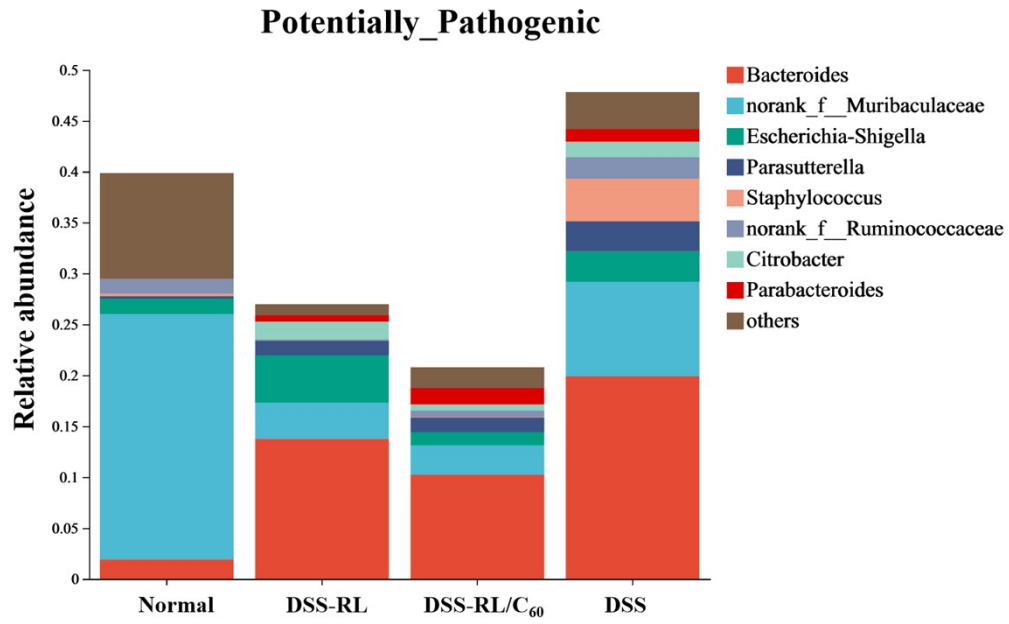

**Fig. S17** Potential pathogenic histogram of microbiome in different groups predicted by BugBase.

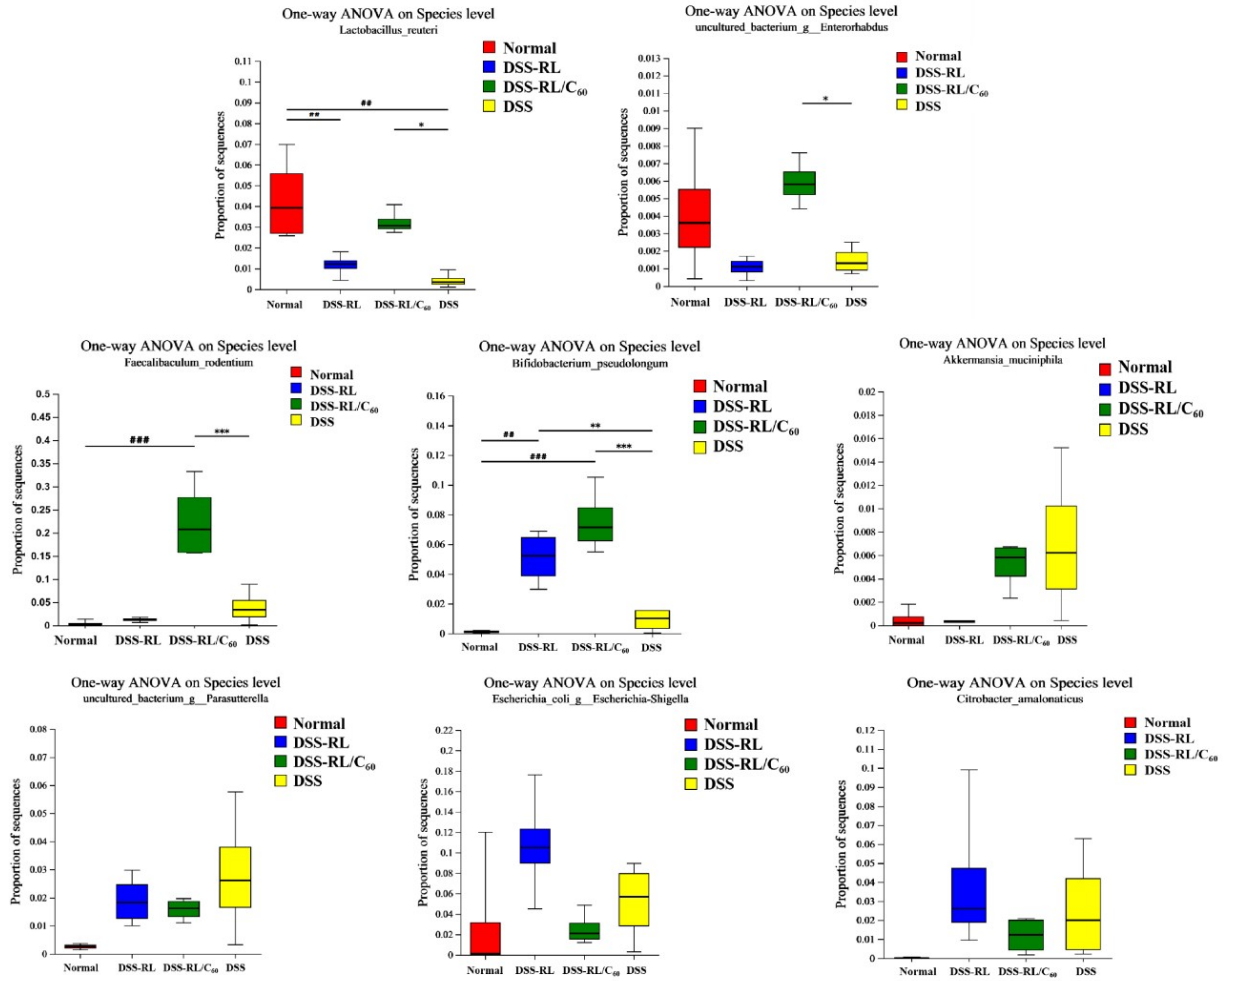

**Fig. S18** RL/C<sub>60</sub> promotes probiotics colonization while suppresses harmful bacteria proliferation. Data are shown as the mean  $\pm$  S.E.M. ( $n = 4$ ). Statistical significance was evaluated via one-way ANOVA with Tukey Test. ##  $P \leq 0.01$ , ###  $P \leq 0.001$  vs Normal; \*  $P \leq 0.05$ , \*\*  $P \leq 0.01$ , \*\*\*  $P \leq 0.001$  vs DSS.

## 6. Intestinal flora-immunity relationship and its implication on UC treatment

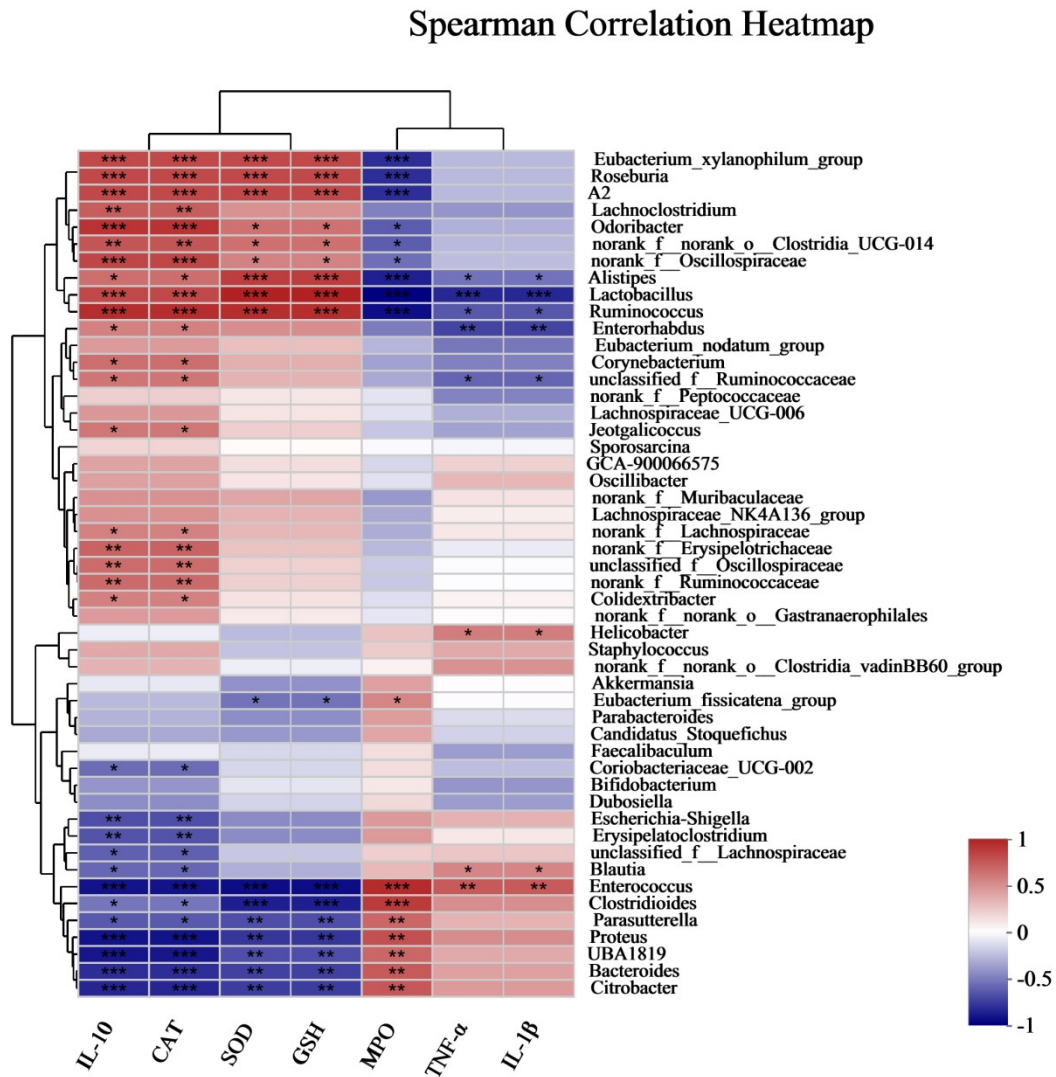

**Fig. S19** Correlation heatmap of inflammatory indicators vs. microflora at genus level. Statistical significance was evaluated via one-way ANOVA with Tukey Test. \*  $P \leq 0.05$ , \*\*  $P \leq 0.01$ , \*\*\*  $P \leq 0.001$ .

**Table S4** SCFAs content in intestinal feces of mice in different group.

| <b>Samples</b>                 | <b>acetic acid</b> | <b>propanoic acid</b> | <b>isobutyric acid</b> | <b>butanoic acid</b> | <b>isovaleric acid</b> | <b>valeric acid</b> | <b>isohexanoic acid</b> | <b>hexanoic acid</b> |
|--------------------------------|--------------------|-----------------------|------------------------|----------------------|------------------------|---------------------|-------------------------|----------------------|
| <b>Normal-1</b>                | 4.450              | 0.730                 | 0.092                  | 0.657                | 0.074                  | 0.068               | 0.015                   | 0.019                |
| <b>Normal-2</b>                | 9.808              | 0.990                 | 0.089                  | 0.323                | 0.069                  | 0.039               | 0.018                   | 0.010                |
| <b>Norma-3</b>                 | 6.420              | 0.918                 | 0.115                  | 0.990                | 0.109                  | 0.157               | 0.022                   | 0.014                |
| <b>DSS-RL-1</b>                | 1.289              | 0.473                 | 0.061                  | 0.249                | 0.079                  | 0.060               | 0.057                   | 0.009                |
| <b>DSS-RL-2</b>                | 2.935              | 1.409                 | 0.204                  | 0.930                | 0.254                  | 0.197               | 0.032                   | 0.009                |
| <b>DSS-RL-3</b>                | 1.677              | 0.635                 | 0.080                  | 0.328                | 0.103                  | 0.078               | 0.067                   | 0.010                |
| <b>DSS-RL/C<sub>60</sub>-1</b> | 8.683              | 0.757                 | 0.101                  | 0.382                | 0.118                  | 0.051               | 0.021                   | 0.018                |
| <b>DSS-RL/C<sub>60</sub>-2</b> | 10.771             | 0.843                 | 0.113                  | 0.530                | 0.152                  | 0.043               | 0.022                   | 0.018                |
| <b>DSS-RL/C<sub>60</sub>-3</b> | 9.589              | 0.727                 | 0.100                  | 0.475                | 0.137                  | 0.041               | 0.016                   | 0.019                |
| <b>DSS-1</b>                   | 1.965              | 0.929                 | 0.143                  | 0.794                | 0.139                  | 0.084               | 0.037                   | 0.009                |
| <b>DSS-2</b>                   | 4.523              | 1.313                 | 0.162                  | 1.002                | 0.205                  | 0.158               | 0.026                   | 0.010                |
| <b>DSS-3</b>                   | 4.893              | 1.815                 | 0.232                  | 1.169                | 0.267                  | 0.129               | 0.044                   | 0.015                |
