# Supplementary material for: Ulcerative colitis alleviation of colon-specific delivered rhamnolipid/fullerene nanocomposites via dual modulation in oxidative stress and intestinal microbiome
Source: Royal Society of Chemistry journal article supplement (doi:10.1039/d3tb00714f), 2023-01-01
Supplement: d3tb00714f2.xlsx [file d3tb00714f2.xlsx]

## Sheet: Normal vs DSS-RL
Species name	Normal-Mean(%)	Normal-Sd(%)	DSS-RL-Mean(%)	DSS-RL-Sd(%)	Pvalue(Normal vs DSS-RL)
g__Bacteroides	2.901	1.372	32.61	5.758	0.03038
g__unclassified_f__Lachnospiraceae	5.197	2.213	18.37	1.245	0.03038
g__Escherichia-Shigella	3.054	5.975	10.78	5.364	0.1939
g__Dubosiella	0.05732	0.08148	5.174	1.077	0.03038
g__Bifidobacterium	0.09795	0.08043	5.068	1.826	0.03038
g__Enterococcus	0.02425	0.03287	4.401	2.121	0.03038
g__Lactobacillus	23.68	15.4	4.168	1.921	0.03038
g__Citrobacter	0.01225	0.02451	4.014	4.018	0.02652
g__norank_f__Muribaculaceae	23.64	3.016	3.778	1.456	0.03038
g__Parasutterella	0.2516	0.09575	1.903	0.9021	0.03038
g__Erysipelatoclostridium	0.2538	0.08862	1.304	0.1116	0.03038
g__Lachnospiraceae_NK4A136_group	13.66	10.7	1.281	0.8894	0.03038
g__Faecalibaculum	0.4154	0.6138	1.177	0.4692	0.1939
g__Parabacteroides	0.03042	0.008737	1.054	0.3968	0.03038
g__Coriobacteriaceae_UCG-002	0.03769	0.05179	0.7025	0.4207	0.03038
g__UBA1819	0.0261	0.01843	0.6399	0.2793	0.03038
g__Proteus	0	0	0.5777	0.4036	0.02107
g__Blautia	0.2001	0.1062	0.4621	0.04547	0.03038
g__Flavonifractor	0.03036	0.03092	0.207	0.09323	0.03038
g__Clostridium_innocuum_group	0	0	0.1759	0.09096	0.02107
g__Candidatus_Stoquefichus	0.01834	0.01255	0.1688	0.06731	0.03038
g__Lachnospiraceae_UCG-006	0.5428	0.2764	0.1595	0.08907	0.0606
g__norank_f__Lachnospiraceae	2.655	1.359	0.128	0.08166	0.03038
g__Romboutsia	0.004405	0.003735	0.1238	0.1141	0.03038
g__norank_f__norank_o__Clostridia_UCG-014	1.549	0.6232	0.1234	0.06012	0.03038
g__Enterorhabdus	0.413	0.3597	0.1096	0.05914	0.1939
g__Helicobacter	0.1326	0.03729	0.1092	0.0499	0.665
g__Lachnoclostridium	0.6638	0.4223	0.1048	0.03861	0.03038
g__Oscillibacter	0.7234	0.6627	0.08457	0.0584	0.03038
g__Anaerofustis	0.004482	0.003068	0.07651	0.0136	0.03038
g__Eubacterium_nodatum_group	0.156	0.05054	0.06746	0.04666	0.0606
g__Colidextribacter	0.6688	0.2182	0.06492	0.03333	0.03038
g__Frisingicoccus	0	0	0.06245	0.01682	0.02107
g__norank_f__Peptococcaceae	0.09835	0.07737	0.06027	0.04332	0.665
g__Candidatus_Soleaferrea	0.008923	0.002463	0.05355	0.02849	0.03038
g__GCA-900066575	0.8329	0.8168	0.0515	0.03712	0.03038
g__norank_f__Ruminococcaceae	0.5879	0.3279	0.04823	0.02722	0.03038
g__norank_f__norank_o__Clostridia_vadinBB60_group	0.3406	0.1561	0.04785	0.05785	0.03038
g__Alistipes	2.016	0.9471	0.04383	0.03755	0.03038
g__unclassified_c__Bacilli	0	0	0.0401	0.03009	0.02107
g__Defluviitaleaceae_UCG-011	0.01575	0.007394	0.03917	0.03612	0.665
g__unclassified_k__norank_d__Bacteria	0	0	0.03414	0.01191	0.02107
g__norank_f__Clostridium_methylpentosum_group	0.0007568	0.001514	0.03147	0.01807	0.02652
g__Akkermansia	0.0546	0.08644	0.02956	0.0144	0.6631
g__Clostridium_sensu_stricto_1	0.2387	0.2602	0.02593	0.03161	0.3123
g__Lachnospiraceae_FCS020_group	0.1463	0.1197	0.02325	0.01819	0.1124
g__norank_f__Erysipelotrichaceae	0.4362	0.1542	0.02238	0.01105	0.03038
g__Family_XIII_AD3011_group	0.04523	0.007548	0.02171	0.0145	0.1124
g__UCG-009	0.07656	0.05083	0.01921	0.01706	0.1124
g__Clostridioides	0	0	0.0184	0.01296	0.02107
g__norank_f__Christensenellaceae	0.03474	0.02689	0.01758	0.01277	0.3123
g__Streptococcus	0.01326	0.007454	0.01342	0.007411	0.8852
g__norank_f__Oscillospiraceae	0.9678	0.5735	0.01275	0.006435	0.03038
g__norank_f__Eubacterium_coprostanoligenes_group	0.0616	0.0386	0.01159	0.008183	0.03038
g__Rikenellaceae_RC9_gut_group	0.4625	0.2379	0.008835	0.00615	0.03038
g__ASF356	0.03789	0.03328	0.008719	0.002559	0.1124
g__Ruminococcus_gauvreauii_group	0.003011	0.004333	0.008129	0.005943	0.3094
g__Eubacterium_fissicatena_group	0.0007658	0.001532	0.008076	0.002333	0.02652
g__NK4A214_group	0.0438	0.02004	0.00758	0.007719	0.03038
g__Enterobacter	0	0	0.005913	0.004442	0.06892
g__Corynebacterium	0.2719	0.2906	0.005362	0.004878	0.03038
g__Acetatifactor	0.1386	0.1226	0.005313	0.004913	0.03038
g__Christensenellaceae_R-7_group	0.05416	0.04146	0.004769	0.003499	0.03038
g__norank_f__norank_o__Gastranaerophilales	0.05931	0.0782	0.004143	0.004785	0.0294
g__Family_XIII_UCG-001	0.03914	0.04108	0.00412	0.005218	0.0294
g__Staphylococcus	0.3931	0.291	0.004067	0.002716	0.03038
g__Allorhizobium-Neorhizobium-Pararhizobium-Rhizobium	0	0	0.003486	0.005318	0.1859
g__norank_f__Eggerthellaceae	0.009013	0.01051	0.003411	0.004149	0.4596
g__Parvibacter	0.002246	0.00289	0.003308	0.003275	0.8824
g__unclassified_f__Ruminococcaceae	0.1587	0.05846	0.002784	0.00397	0.0294
g__Butyricicoccus	0.1838	0.1226	0.002029	0.001355	0.03038
g__Chryseobacterium	0	0	0.001953	0.002498	0.1859
g__Comamonas	0	0	0.001949	0.002483	0.1859
g__Stenotrophomonas	0	0	0.001944	0.003888	0.4533
g__Bilophila	0.1098	0.1013	0.001358	0.002716	0.02652
g__Acinetobacter	0	0	0.001327	0.001533	0.1859
g__unclassified_c__Clostridia	0.008914	0.003467	0.0007018	0.001404	0.02652
g__Ruminococcus_torques_group	0	0	0.0007018	0.001404	0.4533
g__Peptococcus	0.01702	0.01209	0.0007018	0.001404	0.02652
g__Eisenbergiella	0.007426	0.007161	0.0007018	0.001404	0.1241
g__Rikenella	0	0	0.0006791	0.001358	0.4533
g__Paludicola	0.01328	0.01132	0.0006791	0.001358	0.02652
g__norank_f__norank_o__Oscillospirales	0.001471	0.001699	0.0006791	0.001358	0.4084
g__Acetitomaculum	0.006777	0.00971	0.0006791	0.001358	0.1241
g__Gordonibacter	0.06912	0.04142	0.0006527	0.001305	0.02652
g__Flavobacterium	0	0	0.0006527	0.001305	0.4533
g__Marvinbryantia	0.2082	0.2175	0.000648	0.001296	0.02652
g__unclassified_o__Oscillospirales	0.007997	0.01105	0	0	0.1859
g__unclassified_o__Bacteroidales	0.002944	0.002392	0	0	0.06892
g__unclassified_f__Oscillospiraceae	1.124	0.7853	0	0	0.02107
g__unclassified_f__Erysipelotrichaceae	0.02708	0.05417	0	0	0.4533
g__unclassified_f__Eggerthellaceae	0.01519	0.01896	0	0	0.02107
g__unclassified_f__Anaerovoracaceae	0.01951	0.025	0	0	0.06892
g__UCG-005	0.03418	0.02664	0	0	0.02107
g__Tyzzerella	0.0557	0.02072	0	0	0.02107
g__Tuzzerella	0.2153	0.139	0	0	0.02107
g__Turicibacter	0.005998	0.004391	0	0	0.02107
g__Sporosarcina	0.0007658	0.001532	0	0	0.4533
g__Sellimonas	0.003685	0.005538	0	0	0.1859
g__Ruminococcus	0.6861	0.4726	0	0	0.02107
g__Ruminiclostridium	0.004457	0.001734	0	0	0.02107
g__Roseburia	2.597	1.898	0	0	0.02107
g__Psychrobacter	0.01122	0.009858	0	0	0.06892
g__Prevotellaceae_UCG-001	0.5444	0.4963	0	0	0.02107
g__Odoribacter	0.6547	0.5196	0	0	0.02107
g__norank_f__UCG-010	0.1143	0.06675	0	0	0.02107
g__norank_f__norank_o__Rhodospirillales	0.0807	0.05484	0	0	0.02107
g__norank_f__norank_o__RF39	0.2564	0.04927	0	0	0.02107
g__norank_f__norank_o__norank_c__Clostridia	0.0007568	0.001514	0	0	0.4533
g__norank_f__norank_o__Chloroplast	0.001498	0.00173	0	0	0.1859
g__norank_f__Erysipelatoclostridiaceae	0.004475	0.003789	0	0	0.06892
g__Negativibacillus	0.1358	0.1114	0	0	0.02107
g__Muribaculum	0.547	0.1717	0	0	0.02107
g__Monoglobus	0.0381	0.01963	0	0	0.02107
g__Lachnospiraceae_UCG-010	0.008146	0.004387	0	0	0.02107
g__Lachnospiraceae_UCG-001	0.09307	0.1199	0	0	0.02107
g__Jeotgalicoccus	0.0477	0.04274	0	0	0.02107
g__Harryflintia	0.05572	0.0376	0	0	0.02107
g__Glutamicibacter	0.001464	0.002928	0	0	0.4533
g__Gemella	0.01111	0.004379	0	0	0.02107
g__Facklamia	0.01206	0.009689	0	0	0.02107
g__Eubacterium_xylanophilum_group	0.825	0.3477	0	0	0.02107
g__Eubacterium_siraeum_group	0.2129	0.1214	0	0	0.02107
g__Eubacterium_brachy_group	0.09945	0.1173	0	0	0.02107
g__Desulfovibrio	0.09826	0.1354	0	0	0.06892
g__Candidatus_Saccharimonas	0.2	0.1277	0	0	0.02107
g__Candidatus_Arthromitus	0.04273	0.03637	0	0	0.02107
g__Caldicoprobacter	0.01189	0.009281	0	0	0.02107
g__Brevibacterium	0.001523	0.001758	0	0	0.1859
g__Bacillus	0.001523	0.001758	0	0	0.1859
g__Atopostipes	0.002246	0.00289	0	0	0.1859
g__Anaerovorax	0.02758	0.02172	0	0	0.02107
g__Anaerotruncus	0.1713	0.0647	0	0	0.02107
g__Anaerostipes	0.03797	0.04193	0	0	0.06892
g__Anaeroplasma	0.5902	0.3924	0	0	0.02107
g__Allobaculum	0.001464	0.002928	0	0	0.4533
g__Aerococcus	0.01284	0.01012	0	0	0.06892
g__A2	0.8699	0.8349	0	0	0.02107

## Sheet: Normal vs DSS-RLC60
Species name	Normal-Mean(%)	Normal-Sd(%)	DSS-RL/C60-Mean(%)	DSS-RL/C60-Sd(%)	Pvalue(Normal vs DSS-RL/C60)
g__Bacteroides	2.901	1.372	24.56	7.069	0.03038
g__Faecalibaculum	0.4154	0.6138	22.61	8.535	0.03038
g__Lactobacillus	23.68	15.4	8.456	1.364	0.1124
g__Bifidobacterium	0.09795	0.08043	7.554	2.175	0.03038
g__Dubosiella	0.05732	0.08148	6.224	1.229	0.03038
g__unclassified_f__Lachnospiraceae	5.197	2.213	4.139	0.5479	0.8852
g__Corynebacterium	0.2719	0.2906	2.673	4.717	0.4705
g__norank_f__Muribaculaceae	23.64	3.016	2.555	1.225	0.03038
g__Escherichia-Shigella	3.054	5.975	2.554	1.637	0.3123
g__Parabacteroides	0.03042	0.008737	2.208	0.7733	0.03038
g__Parasutterella	0.2516	0.09575	1.566	0.3951	0.03038
g__Lachnospiraceae_NK4A136_group	13.66	10.7	1.279	1.211	0.03038
g__Citrobacter	0.01225	0.02451	1.179	0.9819	0.02652
g__Erysipelatoclostridium	0.2538	0.08862	1.17	0.2283	0.03038
g__Eubacterium_fissicatena_group	0.0007658	0.001532	1.157	0.4916	0.02652
g__Lachnospiraceae_UCG-006	0.5428	0.2764	0.9913	0.4232	0.1939
g__Enterococcus	0.02425	0.03287	0.9696	0.9374	0.03038
g__Enterorhabdus	0.413	0.3597	0.5889	0.1354	0.3123
g__Candidatus_Stoquefichus	0.01834	0.01255	0.5532	0.1817	0.03038
g__Akkermansia	0.0546	0.08644	0.512	0.2051	0.0294
g__norank_f__Peptococcaceae	0.09835	0.07737	0.4972	0.2223	0.03038
g__Coriobacteriaceae_UCG-002	0.03769	0.05179	0.4826	0.2115	0.03038
g__Jeotgalicoccus	0.0477	0.04274	0.4677	0.8405	0.665
g__Lachnoclostridium	0.6638	0.4223	0.4084	0.1649	0.3123
g__unclassified_f__Oscillospiraceae	1.124	0.7853	0.373	0.3132	0.1124
g__unclassified_f__Ruminococcaceae	0.1587	0.05846	0.3181	0.1278	0.0606
g__Psychrobacter	0.01122	0.009858	0.3172	0.5777	0.3123
g__norank_f__Erysipelotrichaceae	0.4362	0.1542	0.2566	0.05989	0.1939
g__Eubacterium_nodatum_group	0.156	0.05054	0.2519	0.08783	0.1124
g__Colidextribacter	0.6688	0.2182	0.2302	0.1557	0.03038
g__norank_f__Ruminococcaceae	0.5879	0.3279	0.2131	0.141	0.1124
g__norank_f__Lachnospiraceae	2.655	1.359	0.1968	0.1998	0.03038
g__norank_f__norank_o__Clostridia_UCG-014	1.549	0.6232	0.1923	0.08265	0.03038
g__UBA1819	0.0261	0.01843	0.1901	0.0852	0.03038
g__norank_f__Oscillospiraceae	0.9678	0.5735	0.1895	0.1832	0.03038
g__Ruminococcus_gauvreauii_group	0.003011	0.004333	0.1548	0.0595	0.0294
g__Facklamia	0.01206	0.009689	0.1296	0.2205	0.665
g__Staphylococcus	0.3931	0.291	0.1092	0.1067	0.1124
g__Romboutsia	0.004405	0.003735	0.09373	0.04155	0.03038
g__ASF356	0.03789	0.03328	0.08839	0.06615	0.3123
g__Candidatus_Saccharimonas	0.2	0.1277	0.08693	0.03678	0.1939
g__Oscillibacter	0.7234	0.6627	0.07633	0.08287	0.03038
g__Proteus	0	0	0.06585	0.08669	0.02107
g__Marvinbryantia	0.2082	0.2175	0.06408	0.01247	0.4705
g__Parvibacter	0.002246	0.00289	0.0595	0.02006	0.0294
g__Helicobacter	0.1326	0.03729	0.05659	0.02312	0.03038
g__Clostridioides	0	0	0.05626	0.05863	0.02107
g__GCA-900066575	0.8329	0.8168	0.05259	0.04002	0.03038
g__Family_XIII_AD3011_group	0.04523	0.007548	0.04877	0.02412	0.4705
g__Acinetobacter	0	0	0.04839	0.04831	0.02107
g__Alistipes	2.016	0.9471	0.04518	0.03144	0.03038
g__Jeotgalibaca	0	0	0.0449	0.0898	0.4533
g__Blautia	0.2001	0.1062	0.03907	0.01393	0.03038
g__Aerococcus	0.01284	0.01012	0.03683	0.03493	0.3836
g__UCG-009	0.07656	0.05083	0.03232	0.01942	0.3123
g__Clostridium_sensu_stricto_1	0.2387	0.2602	0.0323	0.009525	1
g__norank_f__norank_o__Clostridia_vadinBB60_group	0.3406	0.1561	0.02712	0.03862	0.03038
g__Enterobacter	0	0	0.02564	0.02206	0.02107
g__norank_f__Eggerthellaceae	0.009013	0.01051	0.02427	0.001121	0.0606
g__Rikenellaceae_RC9_gut_group	0.4625	0.2379	0.02317	0.01495	0.03038
g__UCG-005	0.03418	0.02664	0.02302	0.02102	0.665
g__Frisingicoccus	0	0	0.02192	0.02177	0.02107
g__Lachnospiraceae_FCS020_group	0.1463	0.1197	0.02086	0.01695	0.1124
g__norank_f__Eubacterium_coprostanoligenes_group	0.0616	0.0386	0.02017	0.00656	0.03038
g__Candidatus_Soleaferrea	0.008923	0.002463	0.02002	0.009446	0.0606
g__unclassified_k__norank_d__Bacteria	0	0	0.01735	0.006307	0.02107
g__Savagea	0	0	0.0171	0.03421	0.4533
g__norank_f__norank_o__Gastranaerophilales	0.05931	0.0782	0.01676	0.01606	0.4705
g__Christensenellaceae_R-7_group	0.05416	0.04146	0.01637	0.008379	0.1939
g__Acetatifactor	0.1386	0.1226	0.01608	0.01002	0.03038
g__Glutamicibacter	0.001464	0.002928	0.01489	0.02811	0.6198
g__Family_XIII_UCG-001	0.03914	0.04108	0.01427	0.003098	0.4705
g__unclassified_f__Eggerthellaceae	0.01519	0.01896	0.01292	0.003685	0.4705
g__Ruminococcus	0.6861	0.4726	0.01236	0.01507	0.03038
g__norank_f__Christensenellaceae	0.03474	0.02689	0.0122	0.008454	0.1124
g__Eubacterium_brachy_group	0.09945	0.1173	0.01146	0.00332	0.03038
g__norank_f__UCG-010	0.1143	0.06675	0.01085	0.01307	0.03038
g__Defluviitaleaceae_UCG-011	0.01575	0.007394	0.01066	0.009666	0.665
g__Rikenella	0	0	0.01033	0.009555	0.06892
g__Brevibacterium	0.001523	0.001758	0.009265	0.01853	0.8687
g__Flavonifractor	0.03036	0.03092	0.008043	0.007025	0.3123
g__Odoribacter	0.6547	0.5196	0.007998	0.005435	0.03038
g__Anaerofustis	0.004482	0.003068	0.007964	0.004613	0.4705
g__Sporosarcina	0.0007658	0.001532	0.007839	0.01568	1
g__norank_f__Clostridium_methylpentosum_group	0.0007568	0.001514	0.007547	0.004473	0.02652
g__Anaerovorax	0.02758	0.02172	0.007477	0.008343	0.1939
g__Butyricicoccus	0.1838	0.1226	0.007401	0.009741	0.03038
g__Gordonibacter	0.06912	0.04142	0.004655	0.004378	0.03038
g__NK4A214_group	0.0438	0.02004	0.004059	0.005178	0.0294
g__unclassified_c__Bacilli	0	0	0.004057	0.002716	0.06892
g__Bilophila	0.1098	0.1013	0.003342	0.005125	0.0294
g__Lacticigenium	0	0	0.002851	0.005701	0.4533
g__Atopostipes	0.002246	0.00289	0.002851	0.005701	0.8687
g__Paludicola	0.01328	0.01132	0.002777	0.003209	0.1102
g__unclassified_c__Clostridia	0.008914	0.003467	0.002704	0.005407	0.1038
g__Pseudomonas	0	0	0.002628	0.003615	0.1859
g__Allorhizobium-Neorhizobium-Pararhizobium-Rhizobium	0	0	0.002028	0.004056	0.4533
g__Chryseobacterium	0	0	0.00139	0.001606	0.1859
g__Anaerotruncus	0.1713	0.0647	0.001351	0.001565	0.0294
g__Turicibacter	0.005998	0.004391	0.0006776	0.001355	0.02652
g__Eisenbergiella	0.007426	0.007161	0.0006759	0.001352	0.1241
g__Brucella	0	0	0.0006385	0.001277	0.4533
g__unclassified_o__Oscillospirales	0.007997	0.01105	0	0	0.1859
g__unclassified_o__Bacteroidales	0.002944	0.002392	0	0	0.06892
g__unclassified_f__Erysipelotrichaceae	0.02708	0.05417	0	0	0.4533
g__unclassified_f__Anaerovoracaceae	0.01951	0.025	0	0	0.06892
g__Tyzzerella	0.0557	0.02072	0	0	0.02107
g__Tuzzerella	0.2153	0.139	0	0	0.02107
g__Streptococcus	0.01326	0.007454	0	0	0.02107
g__Sellimonas	0.003685	0.005538	0	0	0.1859
g__Ruminiclostridium	0.004457	0.001734	0	0	0.02107
g__Roseburia	2.597	1.898	0	0	0.02107
g__Prevotellaceae_UCG-001	0.5444	0.4963	0	0	0.02107
g__Peptococcus	0.01702	0.01209	0	0	0.02107
g__norank_f__norank_o__Rhodospirillales	0.0807	0.05484	0	0	0.02107
g__norank_f__norank_o__RF39	0.2564	0.04927	0	0	0.02107
g__norank_f__norank_o__Oscillospirales	0.001471	0.001699	0	0	0.1859
g__norank_f__norank_o__norank_c__Clostridia	0.0007568	0.001514	0	0	0.4533
g__norank_f__norank_o__Chloroplast	0.001498	0.00173	0	0	0.1859
g__norank_f__Erysipelatoclostridiaceae	0.004475	0.003789	0	0	0.06892
g__Negativibacillus	0.1358	0.1114	0	0	0.02107
g__Muribaculum	0.547	0.1717	0	0	0.02107
g__Monoglobus	0.0381	0.01963	0	0	0.02107
g__Lachnospiraceae_UCG-010	0.008146	0.004387	0	0	0.02107
g__Lachnospiraceae_UCG-001	0.09307	0.1199	0	0	0.02107
g__Harryflintia	0.05572	0.0376	0	0	0.02107
g__Gemella	0.01111	0.004379	0	0	0.02107
g__Eubacterium_xylanophilum_group	0.825	0.3477	0	0	0.02107
g__Eubacterium_siraeum_group	0.2129	0.1214	0	0	0.02107
g__Desulfovibrio	0.09826	0.1354	0	0	0.06892
g__Candidatus_Arthromitus	0.04273	0.03637	0	0	0.02107
g__Caldicoprobacter	0.01189	0.009281	0	0	0.02107
g__Bacillus	0.001523	0.001758	0	0	0.1859
g__Anaerostipes	0.03797	0.04193	0	0	0.06892
g__Anaeroplasma	0.5902	0.3924	0	0	0.02107
g__Allobaculum	0.001464	0.002928	0	0	0.4533
g__Acetitomaculum	0.006777	0.00971	0	0	0.06892
g__A2	0.8699	0.8349	0	0	0.02107

## Sheet: Normal vs DSS
Species name	Normal-Mean(%)	Normal-Sd(%)	DSS-Mean(%)	DSS-Sd(%)	Pvalue(Normal vs DSS)
g__Bacteroides	2.901	1.372	32.15	8.921	0.03038
g__norank_f__Muribaculaceae	23.64	3.016	7.151	5.25	0.03038
g__unclassified_f__Lachnospiraceae	5.197	2.213	5.408	3.379	1
g__Staphylococcus	0.3931	0.291	5.4	5.019	0.03038
g__Escherichia-Shigella	3.054	5.975	5.125	3.93	0.3123
g__Enterococcus	0.02425	0.03287	4.978	3.424	0.03038
g__Lachnospiraceae_NK4A136_group	13.66	10.7	3.914	3.577	0.3123
g__Faecalibaculum	0.4154	0.6138	3.9	3.718	0.3123
g__Clostridioides	0	0	3.382	3.962	0.02107
g__Parasutterella	0.2516	0.09575	2.828	2.276	0.0606
g__Citrobacter	0.01225	0.02451	2.624	2.861	0.02652
g__Corynebacterium	0.2719	0.2906	1.526	2.902	0.665
g__Parabacteroides	0.03042	0.008737	1.509	0.3541	0.03038
g__Sporosarcina	0.0007658	0.001532	1.342	2.683	1
g__Lactobacillus	23.68	15.4	1.295	0.8311	0.03038
g__unclassified_f__Oscillospiraceae	1.124	0.7853	1.187	1.122	1
g__norank_f__Lachnospiraceae	2.655	1.359	1.156	0.9189	0.1124
g__Erysipelatoclostridium	0.2538	0.08862	0.9561	0.5176	0.1939
g__Colidextribacter	0.6688	0.2182	0.948	0.8191	0.8852
g__Eubacterium_fissicatena_group	0.0007658	0.001532	0.9276	1.023	0.02652
g__Bifidobacterium	0.09795	0.08043	0.8808	0.7707	0.3123
g__norank_f__norank_o__Clostridia_vadinBB60_group	0.3406	0.1561	0.7613	0.9761	0.8852
g__Lachnospiraceae_UCG-006	0.5428	0.2764	0.7415	0.5399	0.665
g__GCA-900066575	0.8329	0.8168	0.7238	0.601	1
g__Akkermansia	0.0546	0.08644	0.7005	0.6399	0.05907
g__norank_f__norank_o__Gastranaerophilales	0.05931	0.0782	0.6611	0.7665	0.665
g__norank_f__Ruminococcaceae	0.5879	0.3279	0.5833	0.4794	0.8852
g__Dubosiella	0.05732	0.08148	0.4864	0.5194	0.1124
g__Helicobacter	0.1326	0.03729	0.4776	0.3379	0.3123
g__norank_f__Erysipelotrichaceae	0.4362	0.1542	0.4625	0.3091	0.665
g__Oscillibacter	0.7234	0.6627	0.3506	0.203	0.665
g__Jeotgalicoccus	0.0477	0.04274	0.3296	0.6266	0.8852
g__Lachnoclostridium	0.6638	0.4223	0.3251	0.2401	0.4705
g__Proteus	0	0	0.3201	0.368	0.02107
g__Bacillus	0.001523	0.001758	0.3053	0.6106	0.8687
g__norank_f__Oscillospiraceae	0.9678	0.5735	0.2911	0.2504	0.0606
g__Candidatus_Stoquefichus	0.01834	0.01255	0.282	0.2754	0.03038
g__UBA1819	0.0261	0.01843	0.2807	0.2173	0.03038
g__Blautia	0.2001	0.1062	0.2499	0.1856	0.665
g__Clostridium_sensu_stricto_1	0.2387	0.2602	0.2482	0.4049	0.8852
g__norank_f__Peptococcaceae	0.09835	0.07737	0.2457	0.3035	0.8852
g__norank_f__norank_o__Clostridia_UCG-014	1.549	0.6232	0.2297	0.2121	0.03038
g__Romboutsia	0.004405	0.003735	0.1807	0.2717	0.5614
g__Pseudomonas	0	0	0.173	0.1194	0.02107
g__Enterorhabdus	0.413	0.3597	0.1462	0.0789	0.3123
g__Eubacterium_nodatum_group	0.156	0.05054	0.1373	0.1391	0.8852
g__unclassified_f__Ruminococcaceae	0.1587	0.05846	0.1318	0.1127	0.8852
g__Acetatifactor	0.1386	0.1226	0.127	0.08899	0.8852
g__Lachnospiraceae_FCS020_group	0.1463	0.1197	0.1261	0.1084	1
g__Ruminococcus_gauvreauii_group	0.003011	0.004333	0.1236	0.1918	0.1832
g__Psychrobacter	0.01122	0.009858	0.1136	0.2271	0.5385
g__Coriobacteriaceae_UCG-002	0.03769	0.05179	0.08336	0.08153	0.4705
g__UCG-009	0.07656	0.05083	0.07838	0.06082	1
g__Ruminococcus_torques_group	0	0	0.07768	0.1554	0.4533
g__Butyricicoccus	0.1838	0.1226	0.07063	0.0661	0.1124
g__Enterobacter	0	0	0.06938	0.07311	0.02107
g__Flavonifractor	0.03036	0.03092	0.06784	0.0579	0.3123
g__Candidatus_Saccharimonas	0.2	0.1277	0.06144	0.07582	0.0606
g__Bilophila	0.1098	0.1013	0.04281	0.04485	0.3123
g__Paenalcaligenes	0	0	0.03835	0.07671	0.4533
g__norank_f__Eggerthellaceae	0.009013	0.01051	0.03655	0.0262	0.1124
g__ASF356	0.03789	0.03328	0.036	0.03531	0.8852
g__Acinetobacter	0	0	0.03521	0.0648	0.06892
g__Family_XIII_AD3011_group	0.04523	0.007548	0.02985	0.03177	0.665
g__norank_f__Christensenellaceae	0.03474	0.02689	0.02581	0.02099	0.665
g__Stenotrophomonas	0	0	0.02547	0.04921	0.1859
g__Odoribacter	0.6547	0.5196	0.02348	0.03643	0.03038
g__Facklamia	0.01206	0.009689	0.02256	0.04512	0.3005
g__Turicibacter	0.005998	0.004391	0.01996	0.03052	1
g__Candidatus_Soleaferrea	0.008923	0.002463	0.01979	0.01438	0.665
g__Glutamicibacter	0.001464	0.002928	0.01805	0.0361	1
g__Rikenellaceae_RC9_gut_group	0.4625	0.2379	0.01639	0.03277	0.02652
g__NK4A214_group	0.0438	0.02004	0.01391	0.009632	0.0606
g__Family_XIII_UCG-001	0.03914	0.04108	0.01237	0.00827	0.665
g__Gordonibacter	0.06912	0.04142	0.01136	0.01033	0.1124
g__Comamonas	0	0	0.01043	0.01915	0.1859
g__norank_f__Clostridium_methylpentosum_group	0.0007568	0.001514	0.01009	0.01455	0.2186
g__Solibacillus	0	0	0.009776	0.01955	0.4533
g__Frisingicoccus	0	0	0.008743	0.01277	0.1859
g__Alistipes	2.016	0.9471	0.006828	0.01366	0.02652
g__Defluviitaleaceae_UCG-011	0.01575	0.007394	0.006221	0.009018	0.1913
g__unclassified_k__norank_d__Bacteria	0	0	0.005925	0.01185	0.4533
g__Atopostipes	0.002246	0.00289	0.005922	0.01017	1
g__unclassified_f__Bacillaceae	0	0	0.005264	0.01053	0.4533
g__Streptococcus	0.01326	0.007454	0.005007	0.002891	0.1124
g__Anaerovorax	0.02758	0.02172	0.004968	0.006802	0.1102
g__Peptococcus	0.01702	0.01209	0.004782	0.003367	0.0606
g__Lysinibacillus	0	0	0.004512	0.009024	0.4533
g__unclassified_c__Bacilli	0	0	0.004137	0.005121	0.1859
g__Anaerofustis	0.004482	0.003068	0.003974	0.006262	0.3094
g__Brevibacterium	0.001523	0.001758	0.003729	0.0057	1
g__Aerococcus	0.01284	0.01012	0.003666	0.005714	0.3005
g__Paludicola	0.01328	0.01132	0.003597	0.003833	0.1124
g__Marvinbryantia	0.2082	0.2175	0.00349	0.00415	0.0294
g__norank_f__norank_o__Chloroplast	0.001498	0.00173	0.003472	0.001202	0.4678
g__Parvibacter	0.002246	0.00289	0.003452	0.005164	1
g__norank_f__UCG-010	0.1143	0.06675	0.003452	0.005164	0.0294
g__Harryflintia	0.05572	0.0376	0.003414	0.006828	0.02652
g__Oligella	0	0	0.003008	0.006016	0.4533
g__Ileibacterium	0	0	0.003008	0.006016	0.4533
g__unclassified_c__Clostridia	0.008914	0.003467	0.002744	0.002232	0.03038
g__UCG-005	0.03418	0.02664	0.002731	0.005462	0.05451
g__Rikenella	0	0	0.002731	0.005462	0.4533
g__Savagea	0	0	0.002256	0.004512	0.4533
g__Lacticigenium	0	0	0.002256	0.004512	0.4533
g__norank_f__norank_o__Oscillospirales	0.001471	0.001699	0.002155	0.001441	0.8824
g__Brucella	0	0	0.001403	0.001622	0.1859
g__Desulfovibrio	0.09826	0.1354	0.001366	0.002731	0.1241
g__Flavobacterium	0	0	0.0007206	0.001441	0.4533
g__Chryseobacterium	0	0	0.0007206	0.001441	0.4533
g__Allorhizobium-Neorhizobium-Pararhizobium-Rhizobium	0	0	0.0007206	0.001441	0.4533
g__unclassified_f__Erysipelotrichaceae	0.02708	0.05417	0.0006828	0.001366	1
g__norank_f__norank_o__Rhodospirillales	0.0807	0.05484	0.0006828	0.001366	0.02652
g__norank_f__Eubacterium_coprostanoligenes_group	0.0616	0.0386	0.0006828	0.001366	0.02652
g__Eubacterium_brachy_group	0.09945	0.1173	0.0006828	0.001366	0.02652
g__Eisenbergiella	0.007426	0.007161	0.0006828	0.001366	0.1241
g__Christensenellaceae_R-7_group	0.05416	0.04146	0.0006828	0.001366	0.02652
g__Acetitomaculum	0.006777	0.00971	0.0006828	0.001366	0.1241
g__Anaerotruncus	0.1713	0.0647	0.0006583	0.001317	0.02652
g__unclassified_o__Oscillospirales	0.007997	0.01105	0	0	0.1859
g__unclassified_o__Bacteroidales	0.002944	0.002392	0	0	0.06892
g__unclassified_f__Eggerthellaceae	0.01519	0.01896	0	0	0.02107
g__unclassified_f__Anaerovoracaceae	0.01951	0.025	0	0	0.06892
g__Tyzzerella	0.0557	0.02072	0	0	0.02107
g__Tuzzerella	0.2153	0.139	0	0	0.02107
g__Sellimonas	0.003685	0.005538	0	0	0.1859
g__Ruminococcus	0.6861	0.4726	0	0	0.02107
g__Ruminiclostridium	0.004457	0.001734	0	0	0.02107
g__Roseburia	2.597	1.898	0	0	0.02107
g__Prevotellaceae_UCG-001	0.5444	0.4963	0	0	0.02107
g__norank_f__norank_o__RF39	0.2564	0.04927	0	0	0.02107
g__norank_f__norank_o__norank_c__Clostridia	0.0007568	0.001514	0	0	0.4533
g__norank_f__Erysipelatoclostridiaceae	0.004475	0.003789	0	0	0.06892
g__Negativibacillus	0.1358	0.1114	0	0	0.02107
g__Muribaculum	0.547	0.1717	0	0	0.02107
g__Monoglobus	0.0381	0.01963	0	0	0.02107
g__Lachnospiraceae_UCG-010	0.008146	0.004387	0	0	0.02107
g__Lachnospiraceae_UCG-001	0.09307	0.1199	0	0	0.02107
g__Gemella	0.01111	0.004379	0	0	0.02107
g__Eubacterium_xylanophilum_group	0.825	0.3477	0	0	0.02107
g__Eubacterium_siraeum_group	0.2129	0.1214	0	0	0.02107
g__Candidatus_Arthromitus	0.04273	0.03637	0	0	0.02107
g__Caldicoprobacter	0.01189	0.009281	0	0	0.02107
g__Anaerostipes	0.03797	0.04193	0	0	0.06892
g__Anaeroplasma	0.5902	0.3924	0	0	0.02107
g__Allobaculum	0.001464	0.002928	0	0	0.4533
g__A2	0.8699	0.8349	0	0	0.02107

## Sheet: DSS-RL vs DSS
Species name	DSS-Mean(%)	DSS-Sd(%)	DSS-RL-Mean(%)	DSS-RL-Sd(%)	Pvalue(DSS-RL vs DSS)
g__unclassified_k__norank_d__Bacteria	0.005925	0.01185	0.03414	0.01191	0.05451
g__unclassified_f__Ruminococcaceae	0.1318	0.1127	0.002784	0.00397	0.05907
g__unclassified_f__Oscillospiraceae	1.187	1.122	0	0	0.02107
g__unclassified_f__Lachnospiraceae	5.408	3.379	18.37	1.245	0.03038
g__unclassified_f__Erysipelotrichaceae	0.0006828	0.001366	0	0	0.4533
g__unclassified_f__Bacillaceae	0.005264	0.01053	0	0	0.4533
g__unclassified_c__Clostridia	0.002744	0.002232	0.0007018	0.001404	0.2186
g__unclassified_c__Bacilli	0.004137	0.005121	0.0401	0.03009	0.0294
g__UCG-009	0.07838	0.06082	0.01921	0.01706	0.3123
g__UCG-005	0.002731	0.005462	0	0	0.4533
g__UBA1819	0.2807	0.2173	0.6399	0.2793	0.1124
g__Turicibacter	0.01996	0.03052	0	0	0.02107
g__Streptococcus	0.005007	0.002891	0.01342	0.007411	0.0606
g__Stenotrophomonas	0.02547	0.04921	0.001944	0.003888	0.6198
g__Staphylococcus	5.4	5.019	0.004067	0.002716	0.03038
g__Sporosarcina	1.342	2.683	0	0	0.4533
g__Solibacillus	0.009776	0.01955	0	0	0.4533
g__Savagea	0.002256	0.004512	0	0	0.4533
g__Ruminococcus_torques_group	0.07768	0.1554	0.0007018	0.001404	1
g__Ruminococcus_gauvreauii_group	0.1236	0.1918	0.008129	0.005943	0.3123
g__Romboutsia	0.1807	0.2717	0.1238	0.1141	0.8852
g__Rikenellaceae_RC9_gut_group	0.01639	0.03277	0.008835	0.00615	0.3005
g__Rikenella	0.002731	0.005462	0.0006791	0.001358	1
g__Psychrobacter	0.1136	0.2271	0	0	0.4533
g__Pseudomonas	0.173	0.1194	0	0	0.02107
g__Proteus	0.3201	0.368	0.5777	0.4036	0.4705
g__Peptococcus	0.004782	0.003367	0.0007018	0.001404	0.1241
g__Parvibacter	0.003452	0.005164	0.003308	0.003275	1
g__Parasutterella	2.828	2.276	1.903	0.9021	0.665
g__Parabacteroides	1.509	0.3541	1.054	0.3968	0.1939
g__Paludicola	0.003597	0.003833	0.0006791	0.001358	0.2186
g__Paenalcaligenes	0.03835	0.07671	0	0	0.4533
g__Oscillibacter	0.3506	0.203	0.08457	0.0584	0.1124
g__Oligella	0.003008	0.006016	0	0	0.4533
g__Odoribacter	0.02348	0.03643	0	0	0.06892
g__norank_f__UCG-010	0.003452	0.005164	0	0	0.1859
g__norank_f__Ruminococcaceae	0.5833	0.4794	0.04823	0.02722	0.03038
g__norank_f__Peptococcaceae	0.2457	0.3035	0.06027	0.04332	0.665
g__norank_f__Oscillospiraceae	0.2911	0.2504	0.01275	0.006435	0.1124
g__norank_f__norank_o__Rhodospirillales	0.0006828	0.001366	0	0	0.4533
g__norank_f__norank_o__Oscillospirales	0.002155	0.001441	0.0006791	0.001358	0.1241
g__norank_f__norank_o__Gastranaerophilales	0.6611	0.7665	0.004143	0.004785	0.1832
g__norank_f__norank_o__Clostridia_vadinBB60_group	0.7613	0.9761	0.04785	0.05785	0.03038
g__norank_f__norank_o__Clostridia_UCG-014	0.2297	0.2121	0.1234	0.06012	0.665
g__norank_f__norank_o__Chloroplast	0.003472	0.001202	0	0	0.02107
g__norank_f__Muribaculaceae	7.151	5.25	3.778	1.456	0.3123
g__norank_f__Lachnospiraceae	1.156	0.9189	0.128	0.08166	0.1939
g__norank_f__Eubacterium_coprostanoligenes_group	0.0006828	0.001366	0.01159	0.008183	0.05451
g__norank_f__Erysipelotrichaceae	0.4625	0.3091	0.02238	0.01105	0.03038
g__norank_f__Eggerthellaceae	0.03655	0.0262	0.003411	0.004149	0.05907
g__norank_f__Clostridium_methylpentosum_group	0.01009	0.01455	0.03147	0.01807	0.1124
g__norank_f__Christensenellaceae	0.02581	0.02099	0.01758	0.01277	0.665
g__NK4A214_group	0.01391	0.009632	0.00758	0.007719	0.4705
g__Marvinbryantia	0.00349	0.00415	0.000648	0.001296	0.4084
g__Lysinibacillus	0.004512	0.009024	0	0	0.4533
g__Lactobacillus	1.295	0.8311	4.168	1.921	0.0606
g__Lacticigenium	0.002256	0.004512	0	0	0.4533
g__Lachnospiraceae_UCG-006	0.7415	0.5399	0.1595	0.08907	0.0606
g__Lachnospiraceae_NK4A136_group	3.914	3.577	1.281	0.8894	0.4705
g__Lachnospiraceae_FCS020_group	0.1261	0.1084	0.02325	0.01819	0.1124
g__Lachnoclostridium	0.3251	0.2401	0.1048	0.03861	0.3123
g__Jeotgalicoccus	0.3296	0.6266	0	0	0.02107
g__Ileibacterium	0.003008	0.006016	0	0	0.4533
g__Helicobacter	0.4776	0.3379	0.1092	0.0499	0.3123
g__Harryflintia	0.003414	0.006828	0	0	0.4533
g__Gordonibacter	0.01136	0.01033	0.0006527	0.001305	0.1241
g__Glutamicibacter	0.01805	0.0361	0	0	0.4533
g__GCA-900066575	0.7238	0.601	0.0515	0.03712	0.3123
g__Frisingicoccus	0.008743	0.01277	0.06245	0.01682	0.0294
g__Flavonifractor	0.06784	0.0579	0.207	0.09323	0.1124
g__Flavobacterium	0.0007206	0.001441	0.0006527	0.001305	1
g__Family_XIII_UCG-001	0.01237	0.00827	0.00412	0.005218	0.1832
g__Family_XIII_AD3011_group	0.02985	0.03177	0.02171	0.0145	1
g__Faecalibaculum	3.9	3.718	1.177	0.4692	0.3123
g__Facklamia	0.02256	0.04512	0	0	0.4533
g__Eubacterium_nodatum_group	0.1373	0.1391	0.06746	0.04666	0.665
g__Eubacterium_fissicatena_group	0.9276	1.023	0.008076	0.002333	0.03038
g__Eubacterium_brachy_group	0.0006828	0.001366	0	0	0.4533
g__Escherichia-Shigella	5.125	3.93	10.78	5.364	0.1124
g__Erysipelatoclostridium	0.9561	0.5176	1.304	0.1116	0.3123
g__Enterorhabdus	0.1462	0.0789	0.1096	0.05914	0.665
g__Enterococcus	4.978	3.424	4.401	2.121	1
g__Enterobacter	0.06938	0.07311	0.005913	0.004442	0.1939
g__Eisenbergiella	0.0006828	0.001366	0.0007018	0.001404	1
g__Dubosiella	0.4864	0.5194	5.174	1.077	0.03038
g__Desulfovibrio	0.001366	0.002731	0	0	0.4533
g__Defluviitaleaceae_UCG-011	0.006221	0.009018	0.03917	0.03612	0.1102
g__Corynebacterium	1.526	2.902	0.005362	0.004878	0.1124
g__Coriobacteriaceae_UCG-002	0.08336	0.08153	0.7025	0.4207	0.0606
g__Comamonas	0.01043	0.01915	0.001949	0.002483	0.8778
g__Colidextribacter	0.948	0.8191	0.06492	0.03333	0.1124
g__Clostridium_sensu_stricto_1	0.2482	0.4049	0.02593	0.03161	0.5614
g__Clostridium_innocuum_group	0	0	0.1759	0.09096	0.02107
g__Clostridioides	3.382	3.962	0.0184	0.01296	0.03038
g__Citrobacter	2.624	2.861	4.014	4.018	0.665
g__Chryseobacterium	0.0007206	0.001441	0.001953	0.002498	0.6198
g__Christensenellaceae_R-7_group	0.0006828	0.001366	0.004769	0.003499	0.1241
g__Candidatus_Stoquefichus	0.282	0.2754	0.1688	0.06731	0.8852
g__Candidatus_Soleaferrea	0.01979	0.01438	0.05355	0.02849	0.1124
g__Candidatus_Saccharimonas	0.06144	0.07582	0	0	0.06892
g__Butyricicoccus	0.07063	0.0661	0.002029	0.001355	0.03038
g__Brucella	0.001403	0.001622	0	0	0.1859
g__Brevibacterium	0.003729	0.0057	0	0	0.1859
g__Blautia	0.2499	0.1856	0.4621	0.04547	0.1124
g__Bilophila	0.04281	0.04485	0.001358	0.002716	0.1241
g__Bifidobacterium	0.8808	0.7707	5.068	1.826	0.03038
g__Bacteroides	32.15	8.921	32.61	5.758	0.8852
g__Bacillus	0.3053	0.6106	0	0	0.4533
g__Atopostipes	0.005922	0.01017	0	0	0.1859
g__ASF356	0.036	0.03531	0.008719	0.002559	0.3123
g__Anaerovorax	0.004968	0.006802	0	0	0.1859
g__Anaerotruncus	0.0006583	0.001317	0	0	0.4533
g__Anaerofustis	0.003974	0.006262	0.07651	0.0136	0.0294
g__Allorhizobium-Neorhizobium-Pararhizobium-Rhizobium	0.0007206	0.001441	0.003486	0.005318	0.6198
g__Alistipes	0.006828	0.01366	0.04383	0.03755	0.1038
g__Akkermansia	0.7005	0.6399	0.02956	0.0144	0.1124
g__Aerococcus	0.003666	0.005714	0	0	0.1859
g__Acinetobacter	0.03521	0.0648	0.001327	0.001533	0.1832
g__Acetitomaculum	0.0006828	0.001366	0.0006791	0.001358	1
g__Acetatifactor	0.127	0.08899	0.005313	0.004913	0.2454

## Sheet: DSS-RLC60 vs DSS
Species name	DSS-Mean(%)	DSS-Sd(%)	DSS-RL/C60-Mean(%)	DSS-RL/C60-Sd(%)	Pvalue(DSS-RL/C60)
g__Bacteroides	32.15	8.921	24.56	7.069	0.4705
g__Faecalibaculum	3.9	3.718	22.61	8.535	0.03038
g__Lactobacillus	1.295	0.8311	8.456	1.364	0.03038
g__Bifidobacterium	0.8808	0.7707	7.554	2.175	0.03038
g__Dubosiella	0.4864	0.5194	6.224	1.229	0.03038
g__unclassified_f__Lachnospiraceae	5.408	3.379	4.139	0.5479	0.665
g__Corynebacterium	1.526	2.902	2.673	4.717	0.3123
g__norank_f__Muribaculaceae	7.151	5.25	2.555	1.225	0.3123
g__Escherichia-Shigella	5.125	3.93	2.554	1.637	0.4705
g__Parabacteroides	1.509	0.3541	2.208	0.7733	0.3123
g__Parasutterella	2.828	2.276	1.566	0.3951	0.3123
g__Lachnospiraceae_NK4A136_group	3.914	3.577	1.279	1.211	0.4705
g__Citrobacter	2.624	2.861	1.179	0.9819	0.4705
g__Erysipelatoclostridium	0.9561	0.5176	1.17	0.2283	0.8852
g__Eubacterium_fissicatena_group	0.9276	1.023	1.157	0.4916	0.4705
g__Lachnospiraceae_UCG-006	0.7415	0.5399	0.9913	0.4232	0.665
g__Enterococcus	4.978	3.424	0.9696	0.9374	0.03038
g__Enterorhabdus	0.1462	0.0789	0.5889	0.1354	0.03038
g__Candidatus_Stoquefichus	0.282	0.2754	0.5532	0.1817	0.1939
g__Akkermansia	0.7005	0.6399	0.512	0.2051	0.8852
g__norank_f__Peptococcaceae	0.2457	0.3035	0.4972	0.2223	0.1939
g__Coriobacteriaceae_UCG-002	0.08336	0.08153	0.4826	0.2115	0.03038
g__Jeotgalicoccus	0.3296	0.6266	0.4677	0.8405	0.4705
g__Lachnoclostridium	0.3251	0.2401	0.4084	0.1649	0.665
g__unclassified_f__Oscillospiraceae	1.187	1.122	0.373	0.3132	0.4705
g__unclassified_f__Ruminococcaceae	0.1318	0.1127	0.3181	0.1278	0.0606
g__Psychrobacter	0.1136	0.2271	0.3172	0.5777	0.1832
g__norank_f__Erysipelotrichaceae	0.4625	0.3091	0.2566	0.05989	0.3123
g__Eubacterium_nodatum_group	0.1373	0.1391	0.2519	0.08783	0.1939
g__Colidextribacter	0.948	0.8191	0.2302	0.1557	0.3123
g__norank_f__Ruminococcaceae	0.5833	0.4794	0.2131	0.141	0.1939
g__norank_f__Lachnospiraceae	1.156	0.9189	0.1968	0.1998	0.1939
g__norank_f__norank_o__Clostridia_UCG-014	0.2297	0.2121	0.1923	0.08265	0.8852
g__UBA1819	0.2807	0.2173	0.1901	0.0852	0.665
g__norank_f__Oscillospiraceae	0.2911	0.2504	0.1895	0.1832	0.665
g__Ruminococcus_gauvreauii_group	0.1236	0.1918	0.1548	0.0595	0.3123
g__Facklamia	0.02256	0.04512	0.1296	0.2205	0.1832
g__Staphylococcus	5.4	5.019	0.1092	0.1067	0.03038
g__Romboutsia	0.1807	0.2717	0.09373	0.04155	1
g__ASF356	0.036	0.03531	0.08839	0.06615	0.1939
g__Candidatus_Saccharimonas	0.06144	0.07582	0.08693	0.03678	0.4705
g__Oscillibacter	0.3506	0.203	0.07633	0.08287	0.0606
g__Proteus	0.3201	0.368	0.06585	0.08669	0.3123
g__Marvinbryantia	0.00349	0.00415	0.06408	0.01247	0.0294
g__Parvibacter	0.003452	0.005164	0.0595	0.02006	0.0294
g__Helicobacter	0.4776	0.3379	0.05659	0.02312	0.1124
g__Clostridioides	3.382	3.962	0.05626	0.05863	0.0606
g__GCA-900066575	0.7238	0.601	0.05259	0.04002	0.3123
g__Family_XIII_AD3011_group	0.02985	0.03177	0.04877	0.02412	0.3123
g__Acinetobacter	0.03521	0.0648	0.04839	0.04831	0.665
g__Alistipes	0.006828	0.01366	0.04518	0.03144	0.1038
g__Jeotgalibaca	0	0	0.0449	0.0898	0.4533
g__Blautia	0.2499	0.1856	0.03907	0.01393	0.3123
g__Aerococcus	0.003666	0.005714	0.03683	0.03493	0.1832
g__UCG-009	0.07838	0.06082	0.03232	0.01942	0.3123
g__Clostridium_sensu_stricto_1	0.2482	0.4049	0.0323	0.009525	1
g__norank_f__norank_o__Clostridia_vadinBB60_group	0.7613	0.9761	0.02712	0.03862	0.03038
g__Enterobacter	0.06938	0.07311	0.02564	0.02206	0.4705
g__norank_f__Eggerthellaceae	0.03655	0.0262	0.02427	0.001121	0.4705
g__Rikenellaceae_RC9_gut_group	0.01639	0.03277	0.02317	0.01495	0.3005
g__UCG-005	0.002731	0.005462	0.02302	0.02102	0.05451
g__Frisingicoccus	0.008743	0.01277	0.02192	0.02177	0.4678
g__Lachnospiraceae_FCS020_group	0.1261	0.1084	0.02086	0.01695	0.1124
g__norank_f__Eubacterium_coprostanoligenes_group	0.0006828	0.001366	0.02017	0.00656	0.02652
g__Candidatus_Soleaferrea	0.01979	0.01438	0.02002	0.009446	0.665
g__unclassified_k__norank_d__Bacteria	0.005925	0.01185	0.01735	0.006307	0.1832
g__Savagea	0.002256	0.004512	0.0171	0.03421	1
g__norank_f__norank_o__Gastranaerophilales	0.6611	0.7665	0.01676	0.01606	0.5614
g__Christensenellaceae_R-7_group	0.0006828	0.001366	0.01637	0.008379	0.02652
g__Acetatifactor	0.127	0.08899	0.01608	0.01002	0.3123
g__Glutamicibacter	0.01805	0.0361	0.01489	0.02811	0.8687
g__Family_XIII_UCG-001	0.01237	0.00827	0.01427	0.003098	0.8852
g__unclassified_f__Eggerthellaceae	0	0	0.01292	0.003685	0.02107
g__Ruminococcus	0	0	0.01236	0.01507	0.06892
g__norank_f__Christensenellaceae	0.02581	0.02099	0.0122	0.008454	0.4705
g__Eubacterium_brachy_group	0.0006828	0.001366	0.01146	0.00332	0.02652
g__norank_f__UCG-010	0.003452	0.005164	0.01085	0.01307	0.4596
g__Defluviitaleaceae_UCG-011	0.006221	0.009018	0.01066	0.009666	0.6573
g__Rikenella	0.002731	0.005462	0.01033	0.009555	0.2186
g__Brevibacterium	0.003729	0.0057	0.009265	0.01853	0.8687
g__Flavonifractor	0.06784	0.0579	0.008043	0.007025	0.0606
g__Odoribacter	0.02348	0.03643	0.007998	0.005435	1
g__Anaerofustis	0.003974	0.006262	0.007964	0.004613	0.3094
g__Sporosarcina	1.342	2.683	0.007839	0.01568	1
g__norank_f__Clostridium_methylpentosum_group	0.01009	0.01455	0.007547	0.004473	0.8852
g__Anaerovorax	0.004968	0.006802	0.007477	0.008343	0.6573
g__Butyricicoccus	0.07063	0.0661	0.007401	0.009741	0.1124
g__Gordonibacter	0.01136	0.01033	0.004655	0.004378	0.5614
g__NK4A214_group	0.01391	0.009632	0.004059	0.005178	0.1102
g__unclassified_c__Bacilli	0.004137	0.005121	0.004057	0.002716	0.8824
g__Bilophila	0.04281	0.04485	0.003342	0.005125	0.1832
g__Lacticigenium	0.002256	0.004512	0.002851	0.005701	1
g__Atopostipes	0.005922	0.01017	0.002851	0.005701	0.6198
g__Paludicola	0.003597	0.003833	0.002777	0.003209	0.8824
g__unclassified_c__Clostridia	0.002744	0.002232	0.002704	0.005407	0.5385
g__Pseudomonas	0.173	0.1194	0.002628	0.003615	0.0294
g__Allorhizobium-Neorhizobium-Pararhizobium-Rhizobium	0.0007206	0.001441	0.002028	0.004056	1
g__Chryseobacterium	0.0007206	0.001441	0.00139	0.001606	0.8687
g__Anaerotruncus	0.0006583	0.001317	0.001351	0.001565	0.6198
g__Turicibacter	0.01996	0.03052	0.0006776	0.001355	0.05451
g__Eisenbergiella	0.0006828	0.001366	0.0006759	0.001352	1
g__Brucella	0.001403	0.001622	0.0006385	0.001277	0.4084
g__unclassified_f__Erysipelotrichaceae	0.0006828	0.001366	0	0	0.4533
g__unclassified_f__Bacillaceae	0.005264	0.01053	0	0	0.4533
g__Streptococcus	0.005007	0.002891	0	0	0.02107
g__Stenotrophomonas	0.02547	0.04921	0	0	0.1859
g__Solibacillus	0.009776	0.01955	0	0	0.4533
g__Ruminococcus_torques_group	0.07768	0.1554	0	0	0.4533
g__Peptococcus	0.004782	0.003367	0	0	0.06892
g__Paenalcaligenes	0.03835	0.07671	0	0	0.4533
g__Oligella	0.003008	0.006016	0	0	0.4533
g__norank_f__norank_o__Rhodospirillales	0.0006828	0.001366	0	0	0.4533
g__norank_f__norank_o__Oscillospirales	0.002155	0.001441	0	0	0.06892
g__norank_f__norank_o__Chloroplast	0.003472	0.001202	0	0	0.02107
g__Lysinibacillus	0.004512	0.009024	0	0	0.4533
g__Ileibacterium	0.003008	0.006016	0	0	0.4533
g__Harryflintia	0.003414	0.006828	0	0	0.4533
g__Flavobacterium	0.0007206	0.001441	0	0	0.4533
g__Desulfovibrio	0.001366	0.002731	0	0	0.4533
g__Comamonas	0.01043	0.01915	0	0	0.1859
g__Bacillus	0.3053	0.6106	0	0	0.4533
g__Acetitomaculum	0.0006828	0.001366	0	0	0.4533
